# Supplementary material for: The need for a complex systems approach in rural health research
Source: PubMed Central journal article supplement — BMJ Open. 2022 Oct 3;12(10):e064646. doi: 10.1136/bmjopen-2022-064646 (PMC9535183; doi:10.1136/bmjopen-2022-064646), 2022-10-03
Supplement: bmjopen-2022-064646.draft_revisions.pdf [file bmjopen-2022-064646.draft_revisions.pdf]

# BMJ Open

BMJ Open is committed to open peer review. As part of this commitment we make the peer review history of every article we publish publicly available.

When an article is published we post the peer reviewers' comments and the authors' responses online. We also post the versions of the paper that were used during peer review. These are the versions that the peer review comments apply to.

The versions of the paper that follow are the versions that were submitted during the peer review process. They are not the versions of record or the final published versions. They should not be cited or distributed as the published version of this manuscript.

BMJ Open is an open access journal and the full, final, typeset and author-corrected version of record of the manuscript is available on our site with no access controls, subscription charges or pay-per-view fees (<http://bmjopen.bmj.com>).

If you have any questions on BMJ Open's open peer review process please email [info.bmjopen@bmj.com](mailto:info.bmjopen@bmj.com)

# BMJ Open

## The need for a complex systems approach in rural health research

|                                 |                                                                                                                                                                                                                                                                                                                       |
|---------------------------------|-----------------------------------------------------------------------------------------------------------------------------------------------------------------------------------------------------------------------------------------------------------------------------------------------------------------------|
| Journal:                        | <i>BMJ Open</i>                                                                                                                                                                                                                                                                                                       |
| Manuscript ID                   | bmjopen-2022-064646.R1                                                                                                                                                                                                                                                                                                |
| Article Type:                   | Communication article presubmission enquiry                                                                                                                                                                                                                                                                           |
| Date Submitted by the Author:   | 17-Jun-2022                                                                                                                                                                                                                                                                                                           |
| Complete List of Authors:       | Hulme, Adam; The University of Queensland, Southern Queensland Rural Health (SQRH)<br>Thompson, Jason; The University of Melbourne, Department of Rural Health<br>Argus, Geoff; The University of Queensland, Southern Queensland Rural Health; University of Southern Queensland, School of Psychology and Wellbeing |
| <b>Primary Subject Heading</b>: | Research methods                                                                                                                                                                                                                                                                                                      |
| Secondary Subject Heading:      | Public health                                                                                                                                                                                                                                                                                                         |
| Keywords:                       | STATISTICS & RESEARCH METHODS, HEALTH SERVICES ADMINISTRATION & MANAGEMENT, PUBLIC HEALTH                                                                                                                                                                                                                             |
|                                 |                                                                                                                                                                                                                                                                                                                       |

SCHOLARONE™  
Manuscripts

## The need for a complex systems approach in rural health research

Adam Hulme\*<sup>1</sup>, Jason Thompson<sup>2</sup>, Geoff Argus<sup>1,3</sup>

\*Corresponding author

<sup>1</sup>Southern Queensland Rural Health

Faculty of Health and Behavioural Sciences

The University of Queensland

Baillie Henderson Hospital campus

Corner Hogg and Tor Streets, Toowoomba QLD 4350

PO Box 24, Harlaxton QLD 4350

P +61 07 4633 9789

M (+61) 488 225 006

E [a.hulme@uq.edu.au](mailto:a.hulme@uq.edu.au)

<sup>2</sup>Department of Rural Health

Faculty of Medicine

The University of Melbourne

Parkville, Victoria, 3010

Australia

<sup>3</sup>School of Psychology and Wellbeing

Faculty of Health, Engineering and Sciences

University of Southern Queensland

Toowoomba, Queensland, 4530

Australia

## Abstract

On a global scale, many major rural health issues have persisted for decades despite the introduction of new health interventions and public health policies. Although research efforts have generated valuable new knowledge about the aetiology of health, disease and health inequities in rural communities, rural health systems remain to be some of the most deprived and challenged in the developed world. Whilst the reasons for this are many, a significant factor contributing to the current state of play is the pressing need for methodological innovation and new scientific approaches that have the capacity to support the translation of novel solutions into ‘real world’ rural contexts. Fortunately, complex systems approaches, which are yet to be applied to rural health systems, could provide answers to some of the most resilient rural health problems in recent times. The purpose of this article is to promote the value and utility of a complex systems approach in rural health research. We explain the benefits of a complex systems approach and provide a background to the complexity sciences, including the main characteristics of complex systems. Two popular computational methods are described. The next step for rural health research involves exploring how a complex systems approach can help with the identification and evaluation of new and existing solutions to policy-resistant rural health issues. This includes generating awareness around the analytical trade-offs that occur between the use of traditional scientific methods and complex systems approaches.

### Strengths and limitations

- We argue that the field of rural health research would benefit greatly from a complementary systems thinking perspective and complexity science paradigm.
- Modelling rural health systems prior to the implementation of new health interventions and/or policies could potentially save time, effort and resources. We propose a number of methods that could be used for this purpose moving forwards.
- The next step for rural health researchers is to become familiar with the complex systems approaches suggested. Doing so will open up new lines of research and possibilities for enhancing the health and well-being of our global rural communities.

## 1.0 Introduction

The field of complexity science engenders its own lexicon, theories, and concepts. We have therefore provided the following key definitions and explanations to assist the reader with an understanding of the material forthcoming.

### 1.1 Terms and definitions

Complex systems are found across the micro (e.g., biological), meso (e.g., individual) and macro (e.g., social) levels of the physical and natural world. Complex systems include biological systems, the earth's atmosphere and climate, ant colonies, diseases, political entities, the stock market, rainforests, organisations and corporations, and pertinent to this article, rural health systems. A complex system is:

“...made up of many heterogenous elements; these elements interact with each other; the interactions produce an emergent effect that is different from the effects of the individual elements; and this effect persists over time and adapts to changing circumstances”.

~Luke and Stamatakis, p.2 (1)

In attempting to map and understand complex systems, systems modellers and analysts often attempt to identify *leverage points*. Leverage points are key places within a complex system where a small intervention can produce a large (positive) effect on the system's outcome. Leverage points are frequently counterintuitive, meaning that change is often required to be enacted in the opposite direction to produce the intended outcome. The points of greatest leverage within a system may not always be obvious at first glance or may even exist beyond initial conceptualisations of a system.

“The silver bullet, the miracle cure, the secret passage, the magic password, the single hero who turns the tide of history. We not only want to believe that there are leverage points, but we also want to know where they are and how to get our hands on them. Leverage points are points of power”.

~Meadows, p.145 (2)

## 1.2 Background and purpose

The purpose of this article is twofold. First, to encourage new ways of thinking about how rural health issues and health inequalities are created, maintained and prevented through a systems research lens; and second, to promote the value and utility of a complex systems approach in this space.

Although the article is written with the rural health researcher in mind, the content may also be interesting to a wider *BMJ Open* readership, including clinicians, service providers, stakeholders and policy-makers tackling the results of failed and/or troubled healthcare systems.

## 1.3 Why rural health?

Rural health is a multidisciplinary area of study within the field of public health that has largely been neglected from a funding and research perspective (3). Whilst specialist research groups and university departments around the world – Australia, Canada, United States, New Zealand, United Kingdom and Europe – are producing excellent (traditional) work in the area of rural health (e.g., 4, 5), the disparities in health outcomes and health inequalities between urban and rural communities continue to persist in the face of new health interventions and policies (6-8). Whilst the reasons for this are many, including factors related to geography, healthcare access, service provision, workforce retention, cultural sensitivities and wider political systems (9), it is these authors' opinion that the rural health research field is also in drastic need of scientific innovation if it is to seriously tackle the complex global challenges that it faces. The answers we seek, and the change that is desired for rural communities by way of research and advances in knowledge, may lie in the field of complexity science and its many diverse approaches, methods and models.

## 2.0 Traditional methods in a complex world

Against a backdrop of increasing global interconnectedness, a growing number of researchers have questioned whether clinical and epidemiological methods can alone identify effective solutions to the most resilient public health problems in recent times (10-15). Arguments have centred around the fact that Randomised Controlled Trials (RCTs) and experimental study designs, considered to be *the* 'gold standard' approaches for assessing causality, are only able to quantify the efficacy of a targeted

1  
2  
3 individual-level health intervention (11-13, 16). Attempts to ‘scale-up’ evidence-based clinical and  
4 behavioural interventions and deliver them into complex, uncontrolled, real-world settings without  
5 consideration of the broader socio-political context is known to erode their fidelity, adoption,  
6 maintenance and effectiveness (17, 18).  
7  
8  
9  
10

11  
12 Whilst the traditional Person, Intervention, Comparison, Outcome (PICO) framework has been met  
13 with considerable success and should continue to be applied to address well-defined causal research  
14 questions, the very act of controlling for background noise; the collapsing down of complexity; the  
15 reliance on data at the expense of theory; and desire to increasingly sharpen the effect of individual-  
16 level health interventions is not optimal for all health problems, social contexts and circumstances  
17 (12, 14-16, 19, 20). The occurrence of health and disease across populations, including rural  
18 communities, can also be viewed as a product of the complex interactions that occur among  
19 biological, behavioural, societal, environmental and political determinants (10, 19, 21). This line of  
20 thinking encourages debate around what exactly constitutes ‘a cause’ from a scientific perspective,  
21 and where within ‘the system’ the most appropriate leverage point may be (10, 11).  
22  
23  
24  
25  
26  
27  
28  
29  
30  
31  
32  
33

34 Analytical reductionism can only deliver on so much if the goal of research is to either: (i) ask  
35 questions about the effectiveness of upstream interventions that exert their effect on downstream  
36 factors and health outcomes over an extended timescale; or (ii) ask questions about how new or  
37 existing solutions can be supported or degraded in context of the wider health system (10, 12, 17, 18,  
38 22). Complementary research approaches are required to explore the intermediate and distal  
39 pathways that shape population health, and by definition rural health, from a broad perspective.  
40  
41  
42  
43  
44  
45  
46

## 47 2.1 From reductionism to complexity

48  
49 In response to the need for system level evaluations of health interventions, there has been a recent  
50 groundswell of interest in epidemiology and public health around the use of *complex systems*  
51 *approaches* from the field of complexity science (16, 21-27). Complex systems approaches are used  
52 to study discontinuous relations, complex forms of non-linear feedback between factors across  
53 multiple levels, networks between people, groups and their environment, and processes of exchange  
54  
55  
56  
57  
58  
59  
60



1  
2  
3 between individual actors in systems that give rise to emergent macro-level system behaviours (1, 10,  
4 21, 23-26, 28-32). There is mounting evidence to suggest that a complex systems approach can be of  
5 practical assistance in both explaining mechanisms driving adverse health outcomes and system  
6 behaviour and also determining where and how to intervene (18, 23-25, 27).  
7  
8  
9  
10

11  
12 Despite growing momentum around complex systems approaches, their specific application to issues  
13 contained within rural health has received a lack of attention. Complex systems approaches may help  
14 to identify new rural health solutions, identify solutions to workforce issues, support cost-benefit  
15 decision-making, and contribute to the evaluation of existing strategies given competing priorities and  
16 the balancing of limited resources.  
17  
18  
19  
20  
21  
22

### 23 **3.0 What is complexity science?**

24  
25  
26 Complexity science is a discipline that attempts to understand and respond to problems that are  
27 dynamic and unpredictable, multi-dimensional, and comprise various interrelated actors and  
28 components (33). Researchers who study complexity, and by extension complex problems, focus on  
29 the *interactions* among various elements within a complex system, rather than on the role and  
30 contribution of those elements in *isolation* (28, 34).  
31  
32  
33  
34  
35  
36

37 Where appropriate, complexity science proponents will advocate for a systems thinking perspective  
38 over a reductionist one, as doing so is to consider the whole system, and multiple interacting elements  
39 of it, as the primary unit of analysis (28, 34). This affords insight into how the constituent elements of  
40 a complex system converge in context of a much greater whole, which is useful when attempting to  
41 make sense of resilient, persistent and policy resistant problems (12).  
42  
43  
44  
45  
46  
47

#### 48 **3.1 Mapping the complexity sciences**

49  
50  
51 Complexity science incorporates multiple traditions, disciplines, methods, techniques and analytical  
52 tools. The *Map of the Complexity Sciences* (35) (Figure 1) shows the historical progression of five  
53 major intellectual traditions over several decades. There is no single, unified understanding of what  
54 complexity science is when it is subjected to formal investigation and analysis (34). Which complex  
55  
56  
57  
58  
59  
60

1  
2  
3 systems approach to adopt depends on many factors, including available resources, individual  
4  
5 expertise and the type of problem to be examined.  
6  
7  
8  
9

10  
11 <Insert Figure 1 about here>  
12  
13  
14  
15

#### 16 **4.0 Characteristics of complex systems**

17  
18 There are discernible characteristics that are universal to all complex systems. Type 2 Diabetes  
19  
20 Mellitus (T2DM), a significant issue in the Australian rural health sector, is selected to elucidate the  
21  
22 key concepts. This section elaborates in greater detail on the definition of a complex system provided  
23  
24 at the opening of the communication (1).  
25  
26  
27  
28  
29  
30  
31  
32  
33  
34  
35  
36  
37  
38  
39  
40  
41  
42  
43  
44  
45  
46  
47  
48  
49  
50  
51  
52  
53  
54  
55  
56  
57  
58  
59  
60

Table 1: Complex systems characteristics. The characteristics and descriptions appear in Hulme et al. 2019 (30) and 2020 (34); however, the examples reflect the occurrence of Type 2 Diabetes Mellitus (T2DM) within the Australian context.

| Characteristic                                                | Description                                                                                                                                                                          | T2DM example                                                                                                                                                                                                                                                                                                                                                                                                                                                                                                                                                                                                                                                                                                                                                                                                            |
|---------------------------------------------------------------|--------------------------------------------------------------------------------------------------------------------------------------------------------------------------------------|-------------------------------------------------------------------------------------------------------------------------------------------------------------------------------------------------------------------------------------------------------------------------------------------------------------------------------------------------------------------------------------------------------------------------------------------------------------------------------------------------------------------------------------------------------------------------------------------------------------------------------------------------------------------------------------------------------------------------------------------------------------------------------------------------------------------------|
| Multiple system levels, scalable                              | Complex systems vary in type, size, and scale, from the micro (e.g., molecular, cellular), through to the meso (e.g., individual) and macro (e.g., socioeconomic, political) levels. | <ul style="list-style-type: none"> <li>The occurrence of T2DM can be conceptualised and studied at the cellular (e.g., insulin secretion by pancreatic <math>\beta</math>-cells), individual (e.g., behavioural), societal (e.g., employment security, living conditions) or policy (e.g., provision of state and Commonwealth funding) levels.</li> <li>The T2DM system is composed of, and is a component within, other complex systems (i.e., complex systems are nested).</li> <li>Focussing on individual behaviour change alone, such as physical inactivity or diet, will not be effective at preventing the occurrence of T2DM in rural communities. Biological factors, individual behaviours, and personal motivations should be explored, understood and contextualised within a broader context.</li> </ul> |
| Diverse range of agents (i.e., people and organisations), and | Complex systems contain many fundamentally different agents and factors that interact, both within and across                                                                        | <p>The occurrence of T2DM is influenced by a multitude of agents and factors:</p> <ul style="list-style-type: none"> <li>Biological predisposition (e.g., familial history, genetics)</li> <li>Physiology (e.g., blood lipid levels, weight)</li> </ul>                                                                                                                                                                                                                                                                                                                                                                                                                                                                                                                                                                 |

1  
2  
3 factors

multiple system levels.

- 
- Demographics (e.g., age, sex, race, ethnicity)
  - Psychology (e.g., risk perception, individualism)
  - Individual behaviours (e.g., dietary habits, physical activity)
  - Social determinants (e.g., education, health literacy, community groups)
  - Culture (e.g., religion, spirituality, beliefs)
  - Physical environment (e.g., infrastructure, space, food outlets)
  - Natural conditions (e.g., climate, temperature)
  - Geography and location (e.g., isolation, remoteness, food security)
  - Work/employment responsibilities
  - Media, social media, websites/information
  - Healthcare providers (GPs, Allied Health, clinical educators)
  - Private medical and health insurance companies
  - Universities (e.g., Departments/Schools of Rural Health)
  - Sporting and recreational facilities (e.g., clubs, gymnasiums)
  - Local councils (e.g., community events, 'get moving' initiatives)
  - Online health services (e.g., Nurse & Midwife Support)
  - Food distributors and suppliers
-

- 
- Primary Health Networks (PHNs)
  - Hospital and Health Services (HHS)
  - Peak bodies (e.g., Australian Rural Health Education Network; ARHEN)
  - Australian Diabetes organisations and societies
  - State Departments of Health
  - Department of Health (DOH) portfolio agencies
  - Services Australia (e.g., Medicare)

The above list is by no means comprehensive, and many categories can be further expanded. However, the question remains: if decisions and actions at higher levels of the T2DM system influence and exert their effect on proximate individual behaviours and biology, then is it not reasonable to consider distal determinants as part of the broader set of causes to which T2DM emerges? If new Government legislation increased the number of Continuing Professional Development (CPD) credits that Allied Health Professionals were required to undertake annually, and hypothetically this reduced the occurrence of T2DM in the aggregate, then it can be concluded that the legislation change was indeed a causal factor, and perhaps an important leverage point. Any unintended and counterintuitive effects that result

---

---

from this decision would need to be examined using a complex systems approach that has the capacity to model, simulate and forecast causal feedback within systems.

---

Open boundaries

Complex systems are ‘open systems’ with permeable boundaries. They continually learn and reconfigure in response to internal perturbation and external influence and intervention.

- Boundary definitions in complex systems are related to the concept of autopoiesis (i.e., replication and self-organisation of living entities). A complex system can maintain its bounded identity if processes are regenerated between its elements at a defined level of causal determination. It is thus more difficult to identify system boundaries as the level of system entropy and disorder increases. Systems exhibit greater levels of randomness at scale.
  - Depending on the research purpose and aims, the boundary of the T2DM system can be defined at a micro (e.g., biological), meso (e.g., individual) or macro (e.g., socio-political) level.
  - People living in rural and remote communities do not operate within a sociocultural or political vacuum. If upstream factors shape and regulate individual behaviours and biology, then it may be acceptable to establish the T2DM system boundary at the macroscopic level in order to guide
-

1  
2  
3  
4  
5  
6  
7  
8  
9  
10  
11  
12  
13  
14  
15  
16  
17  
18  
19  
20  
21  
22  
23  
24  
25  
26  
27  
28  
29  
30  
31  
32  
33  
34  
35  
36  
37  
38  
39  
40  
41  
42  
43  
44  
45  
46

---

prevention initiatives across populations.

---

Adaptive & self-organising

Complex systems continually shift towards and away from acceptable boundaries of safety and performance. Abrupt transitions without adequate adaptation to maintain equilibrium can result in a tipping point, or system failure.

- People living in rural and remote communities continuously navigate through a changing set of everyday circumstances to maintain health and well-being, and to minimise the risk of disease and ill-health.
  - Complex rural health systems migrate towards, and shift away from, acceptable boundaries of health and disease.
  - The release of a new T2DM health policy; the ‘boom and bust’ economic cycles that can occur in rural locations; workforce shortages/fluctuations; temporary service provisions; seasonal variations that dictate food quality and availability; emerging pandemics and natural disasters in already under resourced settings; new state-level programs and initiatives to increase physical activity; sporting events; and the influence of peer groups, community members and social pressures on the expression of individual behaviours can collectively ‘pull’ the rural health system in different directions.
  - There is no hierarchy of command or identifiable controller of events, only a rural health system that is forced to readjust to systemic change with
-

---

|    |                    |                                                                |
|----|--------------------|----------------------------------------------------------------|
|    |                    | individuals and communities attempting to respond accordingly. |
| 1  |                    |                                                                |
| 2  |                    |                                                                |
| 3  |                    |                                                                |
| 4  |                    |                                                                |
| 5  | Complex behaviours |                                                                |
| 6  | and relationships  |                                                                |
| 7  |                    |                                                                |
| 8  |                    |                                                                |
| 9  |                    |                                                                |
| 10 |                    |                                                                |
| 11 |                    |                                                                |
| 12 |                    |                                                                |
| 13 |                    |                                                                |
| 14 |                    |                                                                |
| 15 |                    |                                                                |
| 16 |                    |                                                                |
| 17 |                    |                                                                |
| 18 |                    |                                                                |
| 19 |                    |                                                                |
| 20 |                    |                                                                |
| 21 |                    |                                                                |
| 22 |                    |                                                                |
| 23 |                    |                                                                |
| 24 |                    |                                                                |
| 25 |                    |                                                                |
| 26 |                    |                                                                |
| 27 |                    |                                                                |
| 28 |                    |                                                                |
| 29 |                    |                                                                |
| 30 |                    |                                                                |
| 31 |                    |                                                                |
| 32 |                    |                                                                |
| 33 |                    |                                                                |
| 34 |                    |                                                                |
| 35 |                    |                                                                |
| 36 |                    |                                                                |
| 37 |                    |                                                                |
| 38 |                    |                                                                |
| 39 |                    |                                                                |
| 40 |                    |                                                                |
| 41 |                    |                                                                |
| 42 |                    |                                                                |
| 43 |                    |                                                                |
| 44 |                    |                                                                |
| 45 |                    |                                                                |
| 46 |                    |                                                                |

---



1  
2  
3  
4  
5  
6  
7  
8  
9  
10  
11  
12  
13  
14  
15  
16  
17  
18  
19  
20  
21  
22  
23  
24  
25  
26  
27  
28  
29  
30  
31  
32  
33  
34  
35  
36  
37  
38  
39  
40  
41  
42  
43  
44  
45  
46

---

however it is possible to interrogate and understand causal feedback and non-linear system behaviours with static and computational modelling approaches. Section 5.0 of this article proposes the use of two suitable computational methods.

---

|                     |                                                                                                                                         |                                                                                                                                                                                                                                                                                                                                                        |
|---------------------|-----------------------------------------------------------------------------------------------------------------------------------------|--------------------------------------------------------------------------------------------------------------------------------------------------------------------------------------------------------------------------------------------------------------------------------------------------------------------------------------------------------|
| Emergent properties | Complex systems give rise to emergence. Emergence is defined as difficult-to-predict, higher-level patterns, behaviours and/or outputs. | <ul style="list-style-type: none"> <li>• T2DM is an emergent phenomenon that results from the complex interactions that occur among a range of heterogenous agents and factors within the rural health system.</li> <li>• The occurrence of T2DM can be viewed as a product of the above system characteristics coming together as a whole.</li> </ul> |
|---------------------|-----------------------------------------------------------------------------------------------------------------------------------------|--------------------------------------------------------------------------------------------------------------------------------------------------------------------------------------------------------------------------------------------------------------------------------------------------------------------------------------------------------|

---

## 5.0 Two complex systems approaches

In the health sciences, two complex systems approaches, Agent-Based Modelling (ABM) and System Dynamics (SD) modelling, are gaining popularity due to their capacity to capture and communicate the behaviours and dynamics of complex systems (23, 36-38) (Table 1). Rural health researchers are encouraged to explore how ABM and SD modelling may help with the identification, implementation and evaluation of new and existing strategies within complex rural health systems.

### 5.1 Agent-Based Modelling (ABM)

ABM is a form of microsimulation whereby interactions between synthetic populations of individual *agents* (e.g., molecules, cells, healthcare professionals, patients) can be observed within a computational environment (31, 32). Ideally, these interactions at the individual-level produce various macro-level patterns and complex behaviours that can grow, reflect or explain real-world phenomena (32). Agents can learn, adapt and respond to change based on the programming of demographic, lifestyle and environmental characteristics (29). Empirical data and/or expert theories can be used to instantiate ABMs depending on the modelling purpose (e.g., prediction, description, explanation) (36, 37, 39).

Methodologically, ABM can be performed hundreds or even thousands of times and the modelled outputs compared under different hypothetical scenarios (1, 20). ABM is an in-silico laboratory that has the capacity to evaluate the potential effectiveness of health policies over time (36, 37). For example, ABM could be used to estimate the incidence rate of T2DM within a virtual rural community following the implementation of various hypothetical health interventions and policies under changing environmental conditions.

A search for the term(s) '((agent-based model[Title/Abstract]) AND (rural health[Title/Abstract]))' in the National Library of Medicine PubMed.gov database (June 2022) produced no articles, pointing to a gap in the rural health literature. The reader is referred to several comprehensive resources covering the origins, purpose and use of ABM (1, 20, 29-32, 36, 37), including issues pertaining to the development, verification and validation of simulations (39, 40).

## 5.2 Systems Dynamics (SD) modelling

The first phase of SD modelling usually involves the development of a Causal Loop Diagram (CLD) (41-43). A CLD is a model that describes the conceptual, causal relationships between variables that comprise a complex system. There are two types of causal loops in a CLD: *reinforcing loops* and *balancing loops* (41-43). Reinforcing loops (labelled 'R' in models) produce exponential growth patterns, whereas balancing loops (labelled 'B' in models) produce exponential collapse. The joint effect of two or more of loops in a CLD can create either equilibrium or polarity within a complex system, the latter of which can trigger rapid oscillation and other chaotic, unpredictable behaviours. Conceptual behaviour over time (BOT) graphs can visualise such patterns (Figure 2) (44).

<Insert Figure 2 about here>

A CLD is a useful standalone method for visualising complexity, including how the various parts of a system (e.g., agents, factors, processes) interact to create a problem (43). Causal loops are, however, static system representations and conceptual errors are often only realised when they are translated into a dynamic format, such as SD modelling.

SD modelling is computational method that can be used to explore the structure and dynamics of both simple and complex systems (38, 41, 45). The method is capable of simulating non-linear behaviours of complex systems over time, primarily using differential equations and related mathematical formulae (30, 31, 45). SD modelling incorporates the same features from a CLD, such as variables, feedback loops and time delays; however, *stocks* and *flows* are also included in the representation to allow for the accumulation and depletion of key elements over time (38) (e.g., inventory, money, assets, employees – the rural health workforce). SD modelling has the capacity to reveal the complex processes and pathways that give rise to emergent system behaviours at a macro-level. It is a useful tool for understanding counterintuitive behaviours within complex systems as a basis to identify potential leverage points for health-related interventions and policies.

1  
2  
3 A recent systematic review of SD modelling in health and medicine provides a comprehensive  
4 overview of the method and its background and reports on 301 different applications (38). Despite  
5 this growth, a search for the term(s) ‘((system dynamics[Title/Abstract]) AND (rural  
6 health[Title/Abstract]))’ in the PubMed.gov database (June 2022) produced no eligible articles. The  
7 research opportunities in rural health are apparent.  
8  
9  
10  
11  
12

## 13 14 **6.0 Methods that are fit for purpose**

15  
16  
17 Complex systems approaches are not intended to act as a replacement for traditional scientific  
18 methods well-suited to simpler problems (e.g., PICO problems) in the health sciences. The analytical  
19 trade-offs associated with both reductionist and complex systems approaches must be acknowledged.  
20 To describe these, we refer to the desiderata *precision*, *fit*, *generality*, and *realism* (46).  
21  
22  
23  
24

25  
26 Clinical and epidemiological methods have the advantage of being able to score relatively highly  
27 across statistical dimensions of precision and fit, albeit they equally score lower in measures of  
28 generality and realism. The inverse is generally true for complex systems approaches which tend to  
29 place a greater reliance on theory relative to data (20). Examples are shown in Figure 3.  
30  
31  
32  
33

34  
35 Precision and fit can be thought of as the capacity of a model to produce precise numerical outputs,  
36 and to make quantitative predictions based on historical data, respectively (46). Realism on the other  
37 hand, explains the accuracy to which a systems model has face validity, describes the world  
38 qualitatively, and agrees with expert mental models. Generality is the extent to which a model has  
39 external validity across domains (46).  
40  
41  
42  
43  
44  
45  
46  
47  
48  
49

50 <Insert Figure 3 about here>

### 51 52 53 54 **6.1 An example multi-method complex systems approach**

55  
56  
57 The main point conveyed by Figure 3 is that there is a trade-off with respect to all four analytical  
58 desiderata (46). Satisfying all four concurrently is not possible via a single application, the outcome  
59  
60

1  
2  
3 of which depends on the research question(s), project goal, use of data and approach. Fortunately, a  
4 multi-method complex systems approach could provide a promising way forward in rural health  
5 research.  
6  
7  
8

9  
10 To illustrate, sacrificing precision and fit for generality and realism is not necessarily a detriment if  
11 the first phase of a research program involves mapping all agents and factors from across the 'rural  
12 health system' that contribute to a health or health system outcome. In this regard, static systems  
13 modelling, such as CLDs or socioecological models, could be a useful starting point to explain and  
14 highlight the key agents, factors, processes and potential leverage points as a means to direct  
15 subsequent analyses. The next step in the research program might involve the use of a 'top down'  
16 computational method, such as SD modelling, to reveal how non-linear system dynamics and  
17 behaviours drive change and shape health outcomes, thereby increasing quantitative precision. The  
18 third and final phase may drill down further into key parts of the rural health system via the use of an  
19 ABM, to understand the complex processes that give rise to health or health system outcomes, albeit  
20 from a 'ground up' perspective that appreciates individual exchanges of information, labour and skill  
21 between health professionals and health system managers. This three-step progression from CLD to  
22 SD to ABM may act as a simple framework by which rural health researchers can become  
23 comfortable and familiar with systems modelling approaches into the future.  
24  
25  
26  
27  
28  
29  
30  
31  
32  
33  
34  
35  
36  
37  
38  
39

## 40 6.2 The many uses of complex systems approaches

41  
42 From the above it is concluded that unlike traditional clinical and epidemiological methods, which are  
43 used exclusively to test well-defined and falsifiable *a priori* causal hypotheses, there are many  
44 different reasons to use a complex systems approach.  
45  
46  
47  
48

49 Static complex systems methods, such as CLDs and socioecological models (2, 27, 30, 34, 42, 43,  
50 46), can be used to:  
51  
52

- 53 i. Synthesise large amounts of evidence and/or information
  - 54 ii. Offer a 'big picture' perspective to e.g., support analysis and intervention design
  - 55 iii. Illustrate complex causal feedback, theorise system dynamics, and identify possible leverage
- 56  
57  
58  
59  
60

- iv. Generate new hypotheses and identify gaps in knowledge
- v. Inform an understanding of the range of factors that contribute to an outcome
- vi. Gain an understanding of the problem ‘envelope’ or system boundary
- vii. Facilitate participatory and group model-building initiatives

Computational complex systems methods, such as ABM and SD modelling (1, 20, 29, 32, 36-41, 45, 46), can be used to:

- i. Explain, predict and forecast the emergence of various patterns and phenomena (e.g., survival rates, impact of health policies, direction of effect of interventions)
- ii. Understand the mechanisms that drive the behaviour of complex systems
- iii. Simulate the dynamics of a problem to observe how factors, structures and systems behave over time
- iv. Conduct multiple in-silico ‘what if’ experiments that otherwise would not be possible in situ

## 7.0 Towards a complex systems approach in rural health

Adopting a complex systems approach in rural health research would recognise that real, long-term change within rural communities is only created when systems and processes are redesigned and reconfigured, and not necessarily when a single ‘fix’ or individual-level health intervention is implemented (12, 22). The role of subject matter expertise and causal theories explaining health generation in rural settings would play a greater role in complexity science applications relative to a traditional scientific approach (10, 20). The triangulation of various sources of data across multiple system levels and from the perspective of various stakeholders would feed into the development of models to enrich understanding of where to intervene in rural health systems (18, 25). Involving rural health communities, consumers, service providers, stakeholders and policy-makers in the development of conceptual systems models would provide a sense of ownership and transparency of the model-construction process to ensure that the resulting solutions are endorsed long-term (38).

Under a complexity framework, rural health researchers would ask not whether a specific intervention *works*; but rather, *how* new or existing solutions could be supported or degraded by the wider system

1  
2  
3 (17, 24). When rural health systems are mapped, modelled and understood, it is possible to identify  
4 where key leverage points may be and how to best to manipulate them through a multidisciplinary  
5 effort (2, 18). These points of leverage may be found across all levels of the complex rural health  
6 system; however, further interrogation of the outputs would expose optimal targets for interventions  
7 and solutions given limited resources and competing priorities. To achieve this, the use of static and  
8 computational methods from the complexity sciences, such as CLD (43), SD modelling (23, 38) and  
9 ABM (32, 36, 37) can be used to conceptualise and simulate the non-linear behaviours of complex  
10 rural health systems. Doing so will offer original data and evidence to complement traditional forms  
11 of scientific inquiry to translate effective new rural health interventions and policies.  
12  
13  
14  
15  
16  
17  
18  
19  
20  
21  
22

23 The field of implementation science has become important in marrying the outcomes of complex  
24 systems thinking and real-world objectives for better health outcomes (18, 24, 25). Implementation  
25 science, which is increasingly integrating realist evaluation theories (24), has seen a tremendous  
26 uptake in the application of complex systems approaches as it allows a better understanding of what  
27 *works*, for *whom*, *when*, and *why* (17, 18, 25). The integration of complexity science, implementation  
28 science and realist evaluation frameworks is an encouraging future direction for rural health research.  
29  
30  
31  
32  
33  
34  
35

### 36 **8.0 Closing remarks**

37  
38  
39 Rural health researchers are encouraged to consider how adopting systems approaches could provide a  
40 new spark in a field that arguably needs scientific innovation and complementary methods. By taking  
41 a systems thinking perspective, rural health researchers can begin to explore, model and understand  
42 the myriad of factors and interactions that contribute to health outcomes and health system issues at  
43 scale, both within and between different rural communities. The present authors welcome this  
44 challenge and embrace the possibilities that are derived from adopting new ways of thinking about,  
45 and scientifically approaching, rural health issues.  
46  
47  
48  
49  
50  
51  
52  
53  
54  
55  
56  
57  
58  
59  
60

### **Contributorship statement**

All authors contributed to the content in accordance with the ICMJE guidelines for authorship. AH: Conceptualisation, writing – initial draft; reviewing and editing. JT: Writing, reviewing and editing. GA: Writing, reviewing and editing.

### **Competing interests**

None declared.

### **Funding**

This research received no external funding or sponsorship. The researchers who completed this work were employed under the Australian government's Rural Health Multidisciplinary Training (RHMT) program.

### **Data sharing statement**

No data are available.



## References

1. Luke DA, Stamatakis KA. Systems science methods in public health: Dynamics, networks, and agents. *Annu Rev Public Health*. 2012;33:357-76.
2. Meadows DH. *Thinking in systems: A primer*. London: Earthscan; 2009.
3. Barclay L, Phillips A, Lyle D. Rural and remote health research: Does the investment match the need? *Australian Journal of Rural Health*. 2018;26(2):74-9.
4. Lyle D, Greenhill J. Two decades of building capacity in rural health education, training and research in Australia: University Departments of Rural Health and Rural Clinical Schools. *Australian Journal of Rural Health*. 2018;26(5):314-22.
5. Wilson CR, Rourke J, Oandasan IF, Bosco C. Progress made on access to rural health care in Canada. *Canadian Family Physician*. 2020;66(1):31.
6. Schopfer DW. Rural health disparities in chronic heart disease. *Preventive Medicine*. 2021;152:106782.
7. Harrington RA, Califf RM, Balamurugan A, Brown N, Benjamin RM, Braund WE, et al. Call to action: Rural health: A presidential advisory from the American Heart Association and American Stroke Association. *Circulation*. 2020;141(10):e615-e44.
8. Iglehart J. The challenging quest to improve rural health care. *New England Journal of Medicine*. 2018;378(5):473-9.
9. AIHW. *Rural and remote health*. Canberra: AIHW; 2020.
10. Galea S, Riddle M, Kaplan GA. Causal thinking and complex system approaches in epidemiology. *Int J Epidemiol*. 2010;39(1):97-106.
11. Vandenbroucke JP, Broadbent A, Pearce N. Causality and causal inference in epidemiology: The need for a pluralistic approach. *Int J Epidemiol*. 2016;45(6):1776-86.

12. Rutter H, Savona N, Glonti K, Bibby J, Cummins S, Finegood DT, et al. The need for a complex systems model of evidence for public health. *The Lancet*. 2017;390(10112):2602-4.
13. Glass TA, Goodman SN, Hernán MA, Samet JM. Causal inference in public health. *Annu Rev Public Health*. 2013;34:61-75.
14. Keyes K, Galea S. What matters most: Quantifying an epidemiology of consequence. *Ann Epidemiol*. 2015;25(5):305-11.
15. Galea S, Keyes KM. What matters, when, for whom? Three questions to guide population health scholarship. *Inj Prev*. 2018;24(Suppl 1):i3-i6.
16. Diez Roux AV. Complex systems thinking and current impasses in health disparities research. *Am J Public Health*. 2011;101(9):1627-34.
17. Zamboni K, Schellenberg J, Hanson C, Betran AP, Dumont A. Assessing scalability of an intervention: why, how and who? *Health Policy and Planning*. 2019;34(7):544-52.
18. Koorts H, Rutter H. A systems approach to scale-up for population health improvement. *Health Res Policy Syst*. 2021;19(1):27.
19. Diez Roux AV. Integrating social and biologic factors in health research: A systems view. *Ann Epidemiol*. 2007;17(7):569-74.
20. Hernán MA. Invited commentary: Agent-Based Models for causal inference—Reweight data and theory in epidemiology. *American Journal of Epidemiology*. 2014;181(2):103-5.
21. Kouser HN, Barnard-Mayers R, Murray E. Complex systems models for causal inference in social epidemiology. *J Epidemiol Community Health*. 2020.
22. Crane M, Nathan N, McKay H, Lee K, Wiggers J, Bauman A. Understanding the sustainment of population health programmes from a whole-of-system approach. *Health Research Policy and Systems*. 2022;20(1):37.

- 1  
2  
3 23. Carey G, Malbon E, Carey N, Joyce A, Crammond B, Carey A. Systems science and systems  
4 thinking for public health: A systematic review of the field. *BMJ Open*. 2015;5(12):e009002.  
5  
6  
7  
8 24. McGill E, Er V, Penney T, Egan M, White M, Meier P, et al. Evaluation of public health  
9 interventions from a complex systems perspective: A research methods review. *Social Science &  
10 Medicine*. 2021;272:113697.  
11  
12  
13  
14  
15 25. Northridge ME, Metcalf SS. Enhancing implementation science by applying best principles of  
16 systems science. *Health Res Policy Syst*. 2016;14(1):74.  
17  
18  
19  
20 26. Trochim WM, Cabrera DA, Milstein B, Gallagher RS, Leischow SJ. Practical challenges of  
21 systems thinking and modeling in public health. *Am J Public Health*. 2006;96(3):538-46.  
22  
23  
24  
25 27. Kiekens A, Dierckx de Casterlé B, Vandamme AM. Qualitative systems mapping for complex  
26 public health problems: A practical guide. *PLoS One*. 2022;17(2):e0264463.  
27  
28  
29  
30 28. Ottino JM. Complex systems. *American Institute of Chemical Engineers AIChE Journal*.  
31 2003;49(2):292.  
32  
33  
34  
35 29. Marshall BD, Paczkowski MM, Seemann L, Tempalski B, Pouget ER, Galea S, et al. A complex  
36 systems approach to evaluate HIV prevention in metropolitan areas: Preliminary implications for  
37 combination intervention strategies. *PLoS One*. 2012;7(9):e44833.  
38  
39  
40  
41 30. Hulme A, McLean S, Salmon PM, Thompson J, Lane BR, Nielsen RO. Computational methods to  
42 model complex systems in sports injury research: Agent-based modelling (ABM) and systems  
43 dynamics (SD) modelling. *British Journal of Sports Medicine*. 2019;53(24):1507.  
44  
45  
46  
47  
48 31. Hulme A, Thompson J, Nielsen RO, Read GJM, McLean S, Lane BR, et al. Using computational  
49 modelling for sports injury prevention: Agent-Based Modelling and System Dynamics modelling.  
50 *Human Factors and Ergonomics in Sport: CRC Press*; 2020. p. 323-44.  
51  
52  
53  
54  
55 32. Hulme A, Thompson J, Nielsen RO, Read GJM, Salmon PM. Towards a complex systems  
56 approach in sports injury research: Simulating running-related injury development with agent-based  
57 modelling. *British Journal of Sports Medicine*. 2019;53(9):560.  
58  
59  
60

- 1  
2  
3 33. Salmon PM, McLean S. Complexity in the beautiful game: Implications for football research and  
4 practice. *Science and Medicine in Football*. 2020;4(2):162-7.  
5  
6  
7  
8 34. Hulme A, McLean S, Salmon PM. Sport as a Complex Socio-Technical System. *Human Factors*  
9 and Ergonomics in Sport: CRC Press; 2020. p. 21-40.  
10  
11  
12 35. Castellani BG, L. Map of the complexity sciences: Art and Science Factory, LLC.; 2021  
13 [Available from: [https://www.art-sciencefactory.com/complexity-map\\_feb09.html](https://www.art-sciencefactory.com/complexity-map_feb09.html).  
14  
15  
16  
17 36. Tracy M, Cerdá M, Keyes KM. Agent-based modeling in public health: Current applications and  
18 future directions. *Annual Review of Public Health*. 2018;39:77.  
19  
20  
21 37. Nianogo RA, Arah OA. Agent-based modeling of noncommunicable diseases: A systematic  
22 review. *Am J Public Health*. 2015;105(3):e20-e31.  
23  
24  
25 38. Darabi N, Hosseinichimeh N. System dynamics modeling in health and medicine: A systematic  
26 literature review. *System Dynamics Review*. 2020;36(1):29-73.  
27  
28  
29 39. Calder M, Craig C, Culley D, de Cani R, Donnelly CA, Douglas R, et al. Computational  
30 modelling for decision-making: Where, why, what, who and how. *Royal Society Open Science*.  
31 2018;5(6):172096.  
32  
33  
34 40. Rand W, Rust RT. Agent-based modeling in marketing: Guidelines for rigor. *International Journal*  
35 *of Research in Marketing*. 2011;28(3):181-93.  
36  
37  
38 41. Forrester JW. Industrial dynamics. *Journal of the Operational Research Society*.  
39 1997;48(10):1037-41.  
40  
41  
42 42. Senge PM. *The fifth discipline: The art and practice of the learning organization*: Currency; 2006.  
43  
44  
45 43. Littlejohns LB, Hill C, Neudorf C. Diverse approaches to creating and using Causal Loop  
46 Diagrams in public health research: Recommendations from a scoping review. *Public Health*  
47 *Reviews*. 2021;42.  
48  
49  
50  
51  
52  
53  
54  
55  
56  
57  
58  
59  
60

- 1  
2  
3 44. Calancie L, Anderson S, Branscomb J, Apostolico AA, Lich KH. Using behavior over time graphs  
4 to spur systems thinking among public health practitioners. Preventing Chronic Disease. 2018;15.  
5  
6  
7  
8 45. Sterman JD. Learning from evidence in a complex world. Am J Public Health. 2006;96(3):505-14.  
9  
10  
11 46. Ip EH, Rahmandad H, Shoham DA, Hammond R, Huang TT, Wang Y, et al. Reconciling  
12 statistical and systems science approaches to public health. Health Educ Behav. 2013;40(1  
13 Suppl):123s-31s.  
14  
15  
16  
17  
18  
19  
20  
21  
22  
23  
24  
25  
26  
27  
28  
29  
30  
31  
32  
33  
34  
35  
36  
37  
38  
39  
40  
41  
42  
43  
44  
45  
46  
47  
48  
49  
50  
51  
52  
53  
54  
55  
56  
57  
58  
59  
60

For peer review only

### Figure legend/captions

Figure 1: Map of the complexity sciences. Redrawn and modified from Castellani and Gerrits (35).

The full colour depiction with associated scholars in the corresponding fields can be viewed at:

[https://www.art-sciencefactory.com/complexity-map\\_feb09.html](https://www.art-sciencefactory.com/complexity-map_feb09.html). The five traditions are: (i) dynamical systems theory; (ii) systems theory; (iii) complex systems theory; (iv) cybernetics; and (v) artificial intelligence. Rural health is indicated from ~2022 onwards leaving open the possibility of applying complex systems approaches to contemporary issues in this space.

Figure 2: A simple Causal Loop Diagram (CLD) (far left) that theoretically explains the behaviour of the rural health workforce. Polarity indicators, positive (+) and negative (-), indicate reinforcing and balancing loops linking variables. If recruitment rate is the same as the departure rate, as shown here, then the behaviour of the workforce over time (in this case 24 months) will result in dynamic equilibrium as shown by the conceptual behaviour over time (BOT) graph (far right). BOT graphs are useful to facilitate group model-building activities; they articulate and synthesise individual mental models and can generate a shared understanding of a problem. CLDs can quickly grow in size and complexity, making it impossible to understand system behaviour. At that point researchers should consider using the CLD as a basis to develop a computational System Dynamics (SD) model.

Figure 3: The trade-off between the analytical desiderata of precision, fit, realism and generality. The article by Ip and colleagues (45) provides an overview of key terms and concepts. Panel A: Linear regression analysis/Randomised Controlled Trial (RCT); Panel B: Agent-Based Model (ABM) of estimated disease incidence; Panel C: System Dynamics (SD) model of health service costs to health service utilisation; Panel D: Causal Loop Diagram (CLD) or a socioecological model of a health system. We note that whilst four simple examples are shown, there are many different traditional statistical approaches and complex systems approaches, including multiple variations *within* them, that would produce different results across the four dimensions.

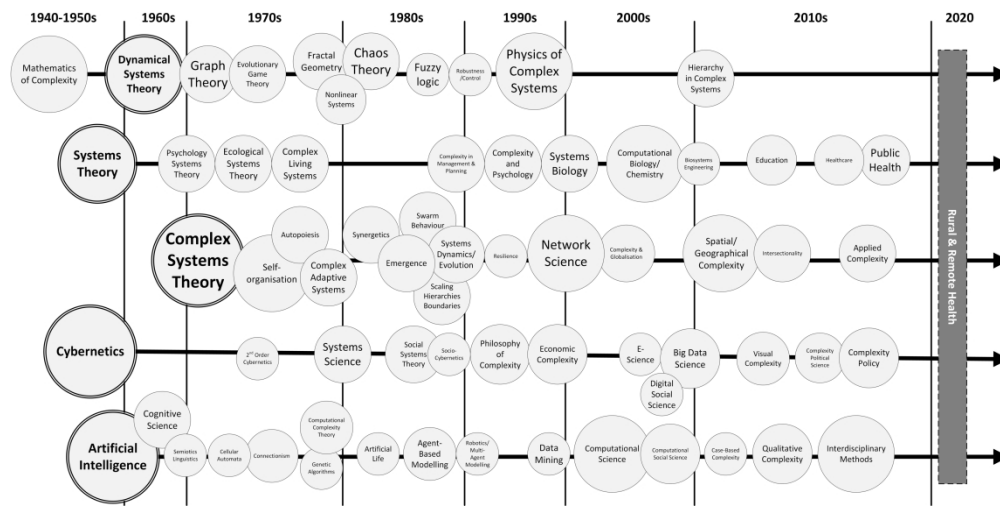

Figure 1: Map of the complexity sciences. Redrawn and modified from Castellani and Gerrits (35). The full colour depiction with associated scholars in the corresponding fields can be viewed at: [https://www.art-sciencefactory.com/complexity-map\\_feb09.html](https://www.art-sciencefactory.com/complexity-map_feb09.html). The five traditions are: (i) dynamical systems theory; (ii) systems theory; (iii) complex systems theory; (iv) cybernetics; and (v) artificial intelligence. Rural health is indicated from ~2022 onwards leaving open the possibility of applying complex systems approaches to contemporary issues in this space.

352x175mm (300 x 300 DPI)

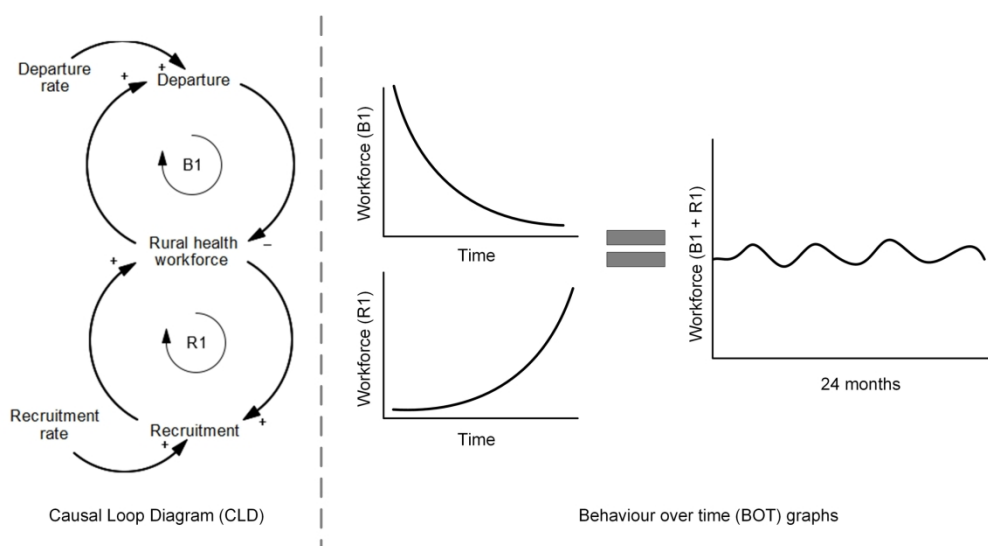

Figure 2: A simple Causal Loop Diagram (CLD) (far left) that theoretically explains the behaviour of the rural health workforce. Polarity indicators, positive (+) and negative (-), indicate reinforcing and balancing loops linking variables. If recruitment rate is the same as the departure rate, as shown here, then the behaviour of the workforce over time (in this case 24 months) will result in dynamic equilibrium as shown by the conceptual behaviour over time (BOT) graph (far right). BOT graphs are useful to facilitate group model-building activities; they articulate and synthesise individual mental models and can generate a shared understanding of a problem. CLDs can quickly grow in size and complexity, making it impossible to understand system behaviour. At that point researchers should consider using the CLD as a basis to develop a computational System Dynamics (SD) model.

206x110mm (300 x 300 DPI)



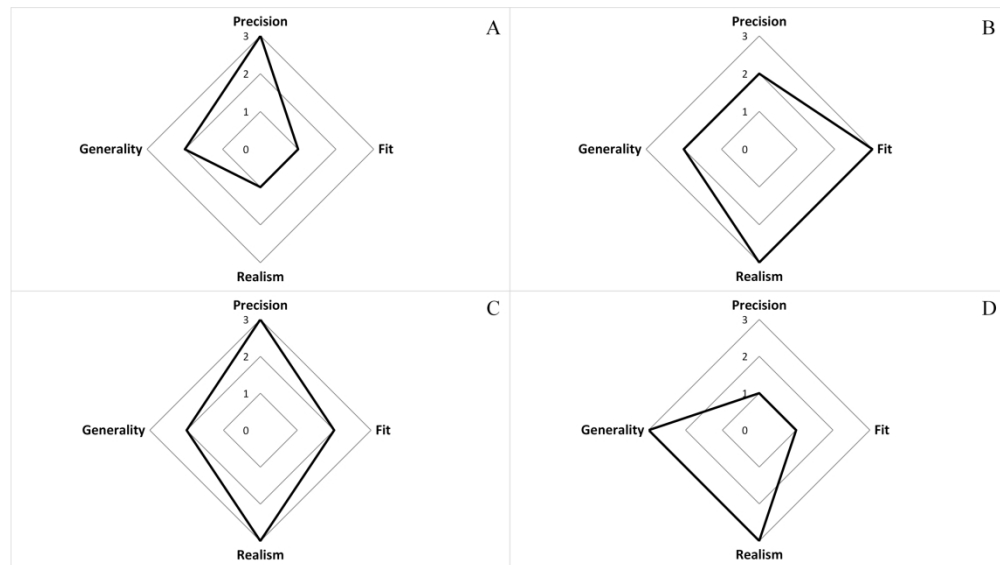

Figure 3: The trade-off between the analytical desiderata of precision, fit, realism and generality. The article by Ip and colleagues (45) provides an overview of key terms and concepts. Panel A: Linear regression analysis/Randomised Controlled Trial (RCT); Panel B: Agent-Based Model (ABM) of estimated disease incidence; Panel C: System Dynamics (SD) model of health service costs to health service utilisation; Panel D: Causal Loop Diagram (CLD) or a socioecological model of a health system. We note that whilst four simple examples are shown, there are many different traditional statistical approaches and complex systems approaches, including multiple variations within them, that would produce different results across the four dimensions.

278x156mm (300 x 300 DPI)

# BMJ Open

## The need for a complex systems approach in rural health research

|                                 |                                                                                                                                                                                                                                                                                                                                                                                                                                                   |
|---------------------------------|---------------------------------------------------------------------------------------------------------------------------------------------------------------------------------------------------------------------------------------------------------------------------------------------------------------------------------------------------------------------------------------------------------------------------------------------------|
| Journal:                        | <i>BMJ Open</i>                                                                                                                                                                                                                                                                                                                                                                                                                                   |
| Manuscript ID                   | bmjopen-2022-064646.R2                                                                                                                                                                                                                                                                                                                                                                                                                            |
| Article Type:                   | Communication                                                                                                                                                                                                                                                                                                                                                                                                                                     |
| Date Submitted by the Author:   | 08-Sep-2022                                                                                                                                                                                                                                                                                                                                                                                                                                       |
| Complete List of Authors:       | Hulme, Adam; The University of Queensland, Southern Queensland Rural Health (SQRH)<br>Thompson, Jason; The University of Melbourne, Department of Rural Health<br>Brown, Andrew; Deakin University, Institute for Health Transformation, Global Centre for Preventive Health and Nutrition<br>Argus, Geoff; The University of Queensland, Southern Queensland Rural Health; University of Southern Queensland, School of Psychology and Wellbeing |
| <b>Primary Subject Heading</b>: | Research methods                                                                                                                                                                                                                                                                                                                                                                                                                                  |
| Secondary Subject Heading:      | Public health                                                                                                                                                                                                                                                                                                                                                                                                                                     |
| Keywords:                       | STATISTICS & RESEARCH METHODS, HEALTH SERVICES ADMINISTRATION & MANAGEMENT, PUBLIC HEALTH                                                                                                                                                                                                                                                                                                                                                         |
|                                 |                                                                                                                                                                                                                                                                                                                                                                                                                                                   |

SCHOLARONE™  
Manuscripts

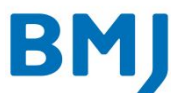

I, the Submitting Author has the right to grant and does grant on behalf of all authors of the Work (as defined in the below author licence), an exclusive licence and/or a non-exclusive licence for contributions from authors who are: i) UK Crown employees; ii) where BMJ has agreed a CC-BY licence shall apply, and/or iii) in accordance with the terms applicable for US Federal Government officers or employees acting as part of their official duties; on a worldwide, perpetual, irrevocable, royalty-free basis to BMJ Publishing Group Ltd ("BMJ") its licensees and where the relevant Journal is co-owned by BMJ to the co-owners of the Journal, to publish the Work in BMJ Open and any other BMJ products and to exploit all rights, as set out in our [licence](#).

The Submitting Author accepts and understands that any supply made under these terms is made by BMJ to the Submitting Author unless you are acting as an employee on behalf of your employer or a postgraduate student of an affiliated institution which is paying any applicable article publishing charge ("APC") for Open Access articles. Where the Submitting Author wishes to make the Work available on an Open Access basis (and intends to pay the relevant APC), the terms of reuse of such Open Access shall be governed by a Creative Commons licence – details of these licences and which [Creative Commons](#) licence will apply to this Work are set out in our licence referred to above.

Other than as permitted in any relevant BMJ Author's Self Archiving Policies, I confirm this Work has not been accepted for publication elsewhere, is not being considered for publication elsewhere and does not duplicate material already published. I confirm all authors consent to publication of this Work and authorise the granting of this licence.

## The need for a complex systems approach in rural health research

Adam Hulme<sup>\*1</sup>, Jason Thompson<sup>2</sup>, Andrew D. Brown<sup>3</sup>, Geoff Argus<sup>1,4</sup>

\*Corresponding author

<sup>1</sup>Southern Queensland Rural Health

Faculty of Health and Behavioural Sciences

The University of Queensland

Baillie Henderson Hospital campus

Corner Hogg and Tor Streets, Toowoomba QLD 4350

PO Box 24, Harlaxton QLD 4350

P +61 07 4633 9789

M (+61) 488 225 006

E [a.hulme@uq.edu.au](mailto:a.hulme@uq.edu.au)

<sup>2</sup>Department of Rural Health

Faculty of Medicine

The University of Melbourne

Parkville, Victoria, 3010

Australia

<sup>3</sup>Institute for Health Transformation

Global Centre for Preventive Health and Nutrition

Deakin University

Geelong, Victoria 3220

Australia

<sup>4</sup>School of Psychology and Wellbeing

Faculty of Health, Engineering and Sciences

1  
2  
3  
4  
5  
6  
7  
8  
9  
10  
11  
12  
13  
14  
15  
16  
17  
18  
19  
20  
21  
22  
23  
24  
25  
26  
27  
28  
29  
30  
31  
32  
33  
34  
35  
36  
37  
38  
39  
40  
41  
42  
43  
44  
45  
46  
47  
48  
49  
50  
51  
52  
53  
54  
55  
56  
57  
58  
59  
60

University of Southern Queensland  
Toowoomba, Queensland, 4530  
Australia

For peer review only

## Abstract

On a global scale, many major rural health issues have persisted for decades despite the introduction of new health interventions and public health policies. Although research efforts have generated valuable new knowledge about the aetiology of health, disease and health inequities in rural communities, rural health systems remain to be some of the most deprived and challenged in both the developing and developed world. Whilst the reasons for this are many, a significant factor contributing to the current state of play is the pressing need for methodological innovation and relevant scientific approaches that have the capacity to support the translation of novel solutions into 'real world' rural contexts. Fortunately, complex systems approaches, which have seen an increase in popularity in the wider public health literature, could provide answers to some of the most resilient rural health problems in recent times. The purpose of this article is to promote the value and utility of a complex systems approach in rural health research. We explain the benefits of a complex systems approach and provide a background to the complexity sciences, including the main characteristics of complex systems. Two popular computational methods are described. The next step for rural health research involves exploring how a complex systems approach can help with the identification and evaluation of new and existing solutions to policy-resistant rural health issues. This includes generating awareness around the analytical trade-offs that occur between the use of traditional scientific methods and complex systems approaches.

## 1.0 Introduction

The field of complexity science engenders its own lexicon, theories and concepts. We have therefore provided the following key definitions and explanations to assist the reader with an understanding of the material forthcoming.

### 1.1 Terms and definitions

Complex systems are found across the micro (e.g., biological), meso (e.g., individual) and macro (e.g., social) levels of the physical and natural world. Complex systems include biological systems, the earth's atmosphere and climate, ant colonies, diseases, political entities, the stock market, rainforests, organisations and corporations, and pertinent to this article, rural health systems. A complex system is:

“...made up of many heterogenous elements; these elements interact with each other; the interactions produce an emergent effect that is different from the effects of the individual elements; and this effect persists over time and adapts to changing circumstances”.

~Luke and Stamatakis, p.2 (1)

In attempting to map and understand complex systems, systems modellers and analysts often attempt to identify *leverage points*. Leverage points are key places within a complex system where a small intervention can produce a large (positive) effect on the system's outcome. Leverage points are frequently counterintuitive, meaning that change is often required to be enacted in the opposite direction to produce the intended outcome. The points of greatest leverage within a system may not necessarily be obvious at first glance or may even exist beyond initial conceptualisations of a system.

“The silver bullet, the miracle cure, the secret passage, the magic password, the single hero who turns the tide of history. We not only want to believe that there are leverage points, but we also want to know where they are and how to get our hands on them. Leverage points are points of power”.

~Meadows, p.145 (2)

## 1.2 Background and purpose

The purpose of this article is twofold. First, to encourage new ways of thinking about how rural health issues and health inequalities are created, maintained and prevented through a systems research lens; and second, to promote the value and utility of a complex systems approach in this space.

Although the article is written with the rural health researcher in mind, the content may also be interesting to a wider *BMJ Open* readership, including clinicians, service providers, stakeholders and policy-makers tackling the results of failed and/or troubled healthcare systems.

## 1.3 Why rural health?

Rural health is a multidisciplinary area of study within the field of public health that has largely been neglected from a funding and research perspective (3). Whilst specialist research groups and university departments around the world – Australia, Canada, United States, New Zealand, United Kingdom and Europe – are producing excellent (traditional) work in the area of rural health (e.g., 4, 5), the disparities in health outcomes and health inequalities between urban and rural communities continue to persist in the face of new health interventions and policies (6-8). Whilst the reasons for this are many, including factors related to geography, healthcare access, service provision, workforce retention, cultural sensitivities and wider political systems (9), it is these authors' opinion that the rural health research field is also in drastic need of scientific innovation if it is to seriously tackle the complex global challenges that it faces. The answers we seek, and the change that is desired for rural communities by way of research and advances in knowledge, may lie in the field of systems research and complexity science and its many diverse approaches, methods and models.

## 2.0 Traditional methods in a complex world

Against a backdrop of increasing global interconnectedness, a growing number of researchers have questioned whether clinical and epidemiological methods can alone identify effective solutions to the most resilient public health problems in recent times (10-15). Arguments have centred around the fact that Randomised Controlled Trials (RCTs) and experimental study designs, considered to be *the* 'gold standard' approaches for assessing causality, are only able to quantify the efficacy of a targeted



1  
2  
3 individual-level health intervention (11-13, 16). Attempts to ‘scale-up’ evidence-based clinical and  
4 behavioural interventions and deliver them into complex, uncontrolled, real-world settings without  
5 consideration of the broader socio-political context is known to erode their fidelity, adoption,  
6 maintenance and effectiveness (17, 18).  
7  
8  
9  
10

11  
12 Whilst the traditional Person, Intervention, Comparison, Outcome (PICO) framework has been met  
13 with considerable success and should continue to be applied to address well-defined causal research  
14 questions, the very act of controlling for background noise; the collapsing down of complexity; the  
15 reliance on data at the expense of theory; and desire to increasingly sharpen the effect of individual-  
16 level health interventions is not optimal for all health problems, social contexts and circumstances  
17 (12, 14-16, 19, 20). The occurrence of health and disease across populations, including rural  
18 communities, can also be viewed as a product of the complex interactions that occur among  
19 biological, behavioural, societal, environmental and political determinants (10, 19, 21). This line of  
20 thinking encourages debate around what exactly constitutes ‘a cause’ from a scientific perspective,  
21 and where within ‘the system’ the most appropriate leverage point may be (10, 11).  
22  
23  
24  
25  
26  
27  
28  
29  
30  
31  
32  
33

34 Analytical reductionism can only deliver on so much if the goal of research is to: (i) ask questions  
35 about the effectiveness of upstream interventions that exert their effect on downstream factors and  
36 health outcomes over an extended timescale; and/or (ii) ask questions about how new or existing  
37 solutions can be supported or degraded in context of the wider health system and its behaviour (10,  
38 12, 17, 18, 22). Complementary research approaches are required to explore the intermediate and  
39 distal pathways that shape population health, and by definition rural health, from a broad perspective.  
40  
41  
42  
43  
44  
45  
46

## 47 2.1 From reductionism to complexity

48  
49 In response to the need for system level evaluations of health interventions, there has been a recent  
50 groundswell of interest in epidemiology and public health around the use of *complex systems*  
51 *approaches* from the field of complexity science (16, 21-27). Complex systems approaches are used  
52 to study discontinuous relations, complex forms of non-linear feedback between factors across  
53 multiple levels, networks between people, groups and their environment, and processes of exchange  
54  
55  
56  
57  
58  
59  
60

1  
2  
3 between individual actors in systems that give rise to emergent macro-level system behaviours (1, 10,  
4 21, 23-26, 28-32). There is mounting evidence to suggest that a complex systems approach can be of  
5 practical assistance in both explaining mechanisms driving adverse health outcomes and system  
6 behaviour and also determining *where* and *how* to intervene through optimal leverage to achieve  
7 positive population health outcomes (18, 23-25, 27).  
8  
9

10  
11  
12  
13  
14 Despite growing momentum around complex systems approaches, their specific application to issues  
15 contained within rural health has received a lack of attention aside from a few notable exceptions,  
16 including systems mapping (33-35) and dynamic modelling (36) studies. Complex systems  
17 approaches may help to identify new rural health solutions, identify key leverage points to address  
18 workforce issues such as provider maldistribution and shortage (e.g., 37), support cost-benefit  
19 decision-making, and contribute to the evaluation of existing strategies given competing priorities and  
20 the balancing of limited resources. Whilst the use of a complex systems approach may not necessarily  
21 differ methodologically between urban, semi-urban and rural health contexts, the contribution of  
22 systems research in rural health specifically lies in the generation of new evidence and knowledge to  
23 complement traditional scientific inquiry.  
24  
25  
26  
27  
28  
29  
30  
31  
32  
33  
34  
35

### 36 **3.0 What is complexity science?**

37  
38  
39 Complexity science is a discipline that attempts to understand and respond to problems that are  
40 dynamic and unpredictable, multi-dimensional, and comprise various interrelated actors and  
41 components (38). Researchers who study complexity, and by extension complex problems, focus on  
42 the *interactions* among various elements within a complex system, rather than on the role and  
43 contribution of those elements in *isolation* (28, 39).  
44  
45  
46  
47  
48  
49

50  
51 Where appropriate, complexity science proponents will advocate for a systems thinking perspective  
52 over a reductionist one, as doing so is to consider the whole system, and multiple interacting elements  
53 of it, as the primary unit of analysis (28, 33, 35, 39). This affords insight into how the constituent  
54 elements of a complex system converge in context of a much greater whole, which is useful when  
55 attempting to make sense of resilient, persistent and policy resistant problems (12).  
56  
57  
58  
59  
60

### 3.1 Mapping the complexity sciences

Complexity science incorporates multiple traditions, disciplines, methods, techniques and analytical tools. The *Map of the Complexity Sciences* (40) (Figure 1) shows the historical progression of five major intellectual traditions over several decades. The ‘map’ shows that there is no single, unified understanding of what complexity science is when it is subjected to formal investigation and analysis (39). Which complex systems approach to adopt depends on many factors, including available resources, individual expertise and the type of problem to be examined.

<Insert Figure 1 about here>

### 4.0 Characteristics of complex systems

There are discernible characteristics that are universal to all complex systems. Type 2 Diabetes Mellitus (T2DM), a significant issue in the Australian rural health sector, is selected to elucidate the key concepts (Table 1). This section elaborates in greater detail on the definition of a complex system provided at the opening of the Communication (1).

Table 1: Complex systems characteristics. The characteristics and descriptions appear in Hulme et al. 2019 (30) and 2020 (39); however, the examples reflect the occurrence of Type 2 Diabetes Mellitus (T2DM) within the Australian context.

| Characteristic                                                | Description                                                                                                                                                                          | T2DM example                                                                                                                                                                                                                                                                                                                                                                                                                                                                                                                                                                                                                                                                                                                                                                                                            |
|---------------------------------------------------------------|--------------------------------------------------------------------------------------------------------------------------------------------------------------------------------------|-------------------------------------------------------------------------------------------------------------------------------------------------------------------------------------------------------------------------------------------------------------------------------------------------------------------------------------------------------------------------------------------------------------------------------------------------------------------------------------------------------------------------------------------------------------------------------------------------------------------------------------------------------------------------------------------------------------------------------------------------------------------------------------------------------------------------|
| Multiple system levels, scalable                              | Complex systems vary in type, size, and scale, from the micro (e.g., molecular, cellular), through to the meso (e.g., individual) and macro (e.g., socioeconomic, political) levels. | <ul style="list-style-type: none"> <li>The occurrence of T2DM can be conceptualised and studied at the cellular (e.g., insulin secretion by pancreatic <math>\beta</math>-cells), individual (e.g., behavioural), societal (e.g., employment security, living conditions) or policy (e.g., provision of state and Commonwealth funding) levels.</li> <li>The T2DM system is composed of, and is a component within, other complex systems (i.e., complex systems are nested).</li> <li>Focussing on individual behaviour change alone, such as physical inactivity or diet, will not be effective at preventing the occurrence of T2DM in rural communities. Biological factors, individual behaviours, and personal motivations should be explored, understood and contextualised within a broader context.</li> </ul> |
| Diverse range of agents (i.e., people and organisations), and | Complex systems contain many fundamentally different agents and factors that interact, both within and across                                                                        | <p>The occurrence of T2DM is influenced by a multitude of agents and factors:</p> <ul style="list-style-type: none"> <li>Biological predisposition (e.g., familial history, genetics)</li> <li>Physiology (e.g., blood lipid levels, weight)</li> </ul>                                                                                                                                                                                                                                                                                                                                                                                                                                                                                                                                                                 |

1  
2  
3  
4  
5  
6  
7  
8  
9  
10  
11  
12  
13  
14  
15  
16  
17  
18  
19  
20  
21  
22  
23  
24  
25  
26  
27  
28  
29  
30  
31  
32  
33  
34  
35  
36  
37  
38  
39  
40  
41  
42  
43  
44  
45  
46

---

factors

multiple system levels.

- Demographics (e.g., age, sex, race, ethnicity)
  - Psychology (e.g., risk perception, individualism)
  - Individual behaviours (e.g., dietary habits, physical activity)
  - Social determinants (e.g., education, health literacy, community groups)
  - Culture (e.g., religion, spirituality, beliefs)
  - Physical environment (e.g., infrastructure, space, food outlets)
  - Natural conditions (e.g., climate, temperature)
  - Geography and location (e.g., isolation, remoteness, food security)
  - Work/employment responsibilities
  - Media, social media, websites/information
  - Healthcare providers (GPs, Allied Health, clinical educators)
  - Private medical and health insurance companies
  - Universities (e.g., Departments/Schools of Rural Health)
  - Sporting and recreational facilities (e.g., clubs, gymnasiums)
  - Local councils (e.g., community events, ‘get moving’ initiatives)
  - Online health services (e.g., Nurse & Midwife Support)
  - Food distributors and suppliers
-

- 
- Primary Health Networks (PHNs)
  - Hospital and Health Services (HHS)
  - Peak bodies (e.g., Australian Rural Health Education Network; ARHEN)
  - Australian Diabetes organisations and societies
  - State Departments of Health
  - Department of Health (DOH) portfolio agencies
  - Services Australia (e.g., Medicare)

The above list is by no means comprehensive, and many categories can be further expanded. However, the question remains: if decisions and actions at higher levels of the T2DM system influence and exert their effect on proximate individual behaviours and biology, then is it not reasonable to consider distal determinants as part of the broader set of causes to which T2DM emerges? If new Government legislation increased the number of Continuing Professional Development (CPD) credits that Allied Health Professionals were required to undertake annually, and hypothetically this reduced the occurrence of T2DM in the aggregate, then it can be concluded that the legislation change was indeed a causal factor, and perhaps an important leverage point. Any unintended and counterintuitive effects that result

---

1  
2  
3  
4  
5  
6  
7  
8  
9  
10  
11  
12  
13  
14  
15  
16  
17  
18  
19  
20  
21  
22  
23  
24  
25  
26  
27  
28  
29  
30  
31  
32  
33  
34  
35  
36  
37  
38  
39  
40  
41  
42  
43  
44  
45  
46

---

from this decision would need to be examined using a complex systems approach that has the capacity to model, simulate and forecast causal feedback within systems.

---

Open boundaries

Complex systems are ‘open systems’ with permeable boundaries. They continually learn and reconfigure in response to internal perturbation and external influence and intervention.

- Boundary definitions in complex systems are related to the concept of autopoiesis (i.e., replication and self-organisation of living entities). A complex system can maintain its bounded identity if processes are regenerated between its elements at a defined level of causal determination. It is thus more difficult to identify system boundaries as the level of system entropy and disorder increases. Systems exhibit greater levels of randomness at scale.
  - Depending on the research purpose and aims, the boundary of the T2DM system can be defined at a micro (e.g., biological), meso (e.g., individual) or macro (e.g., socio-political) level.
  - People living in rural and remote communities do not operate within a sociocultural or political vacuum. If upstream factors shape and regulate individual behaviours and biology, then it may be acceptable to establish the T2DM system boundary at the macroscopic level in order to guide
-

---

prevention initiatives across populations.

- The most impactful solution to T2DM may equally reside *outside* of the immediate health system in other global and political systems. Exogenous influences, such as global conflicts, climate change and food insecurity, may impact endogenous system dynamics. Complex systems approaches may begin to examine the effects of global dynamics on internal behaviours.

---

Adaptive & self-organising

Complex systems continually shift towards and away from acceptable boundaries of safety and performance. Abrupt transitions without adequate adaptation to maintain equilibrium can result in a tipping point, or system failure.

- People living in rural and remote communities continuously navigate through a changing set of everyday circumstances to maintain health and well-being, and to minimise the risk of disease and ill-health.
  - Complex rural health systems migrate towards, and shift away from, acceptable boundaries of health and disease.
  - The release of a new T2DM health policy; the ‘boom and bust’ economic cycles that can occur in rural locations; workforce shortages/fluctuations; temporary service provisions; seasonal variations that dictate food quality and availability; emerging pandemics and natural disasters in already under resourced settings; new state-level programs and initiatives to increase
-



physical activity; sporting events; and the influence of peer groups, community members and social pressures on the expression of individual behaviours can collectively ‘pull’ the rural health system in *different directions*.

- There is no hierarchy of command or identifiable controller of events, only a rural health system that is forced to readjust to systemic change with individuals and communities attempting to respond accordingly in the best way possible according to their needs.

Complex behaviours and relationships

Complex systems exhibit non-linear behaviours and feedback among its many agents and factors. This means that small causes can have large effects and vice versa.

- The cost and availability of healthy food in the environment (or lack thereof) can increase the purchasing of unhealthy food, which in turn, can affect the health of rural populations thereby reducing the desire to improve health status. This effect is *reinforced* and is *cyclical* within tightly-coupled, interconnected rural communities. The resulting perceived value of healthier foods is further diminished, and due to income inequality, a greater number of individuals make poor food choices which feeds directly back into the health of rural communities. Knowledge of nutrition and health, education status, geographic isolation, food

marketing; and, higher up the chain, food policies, tax systems and government mandates exert their effect at the coal face.

- Gradually over time, the incidence rate of T2DM in rural communities increases, and medical/public health researchers are left asking: *what is the cause of T2DM in rural communities, and how can it be appropriately treated and managed?*
- The ‘inputs’ and ‘outputs’ of complex systems are difficult to identify, however it is possible to interrogate and understand causal feedback and non-linear system behaviours with static and computational modelling approaches. Section 5.0 of this article proposes the use of two suitable computational methods.

|                     |                                                                                                                                         |                                                                                                                                                                                                                                                                                                                                                        |
|---------------------|-----------------------------------------------------------------------------------------------------------------------------------------|--------------------------------------------------------------------------------------------------------------------------------------------------------------------------------------------------------------------------------------------------------------------------------------------------------------------------------------------------------|
| Emergent properties | Complex systems give rise to emergence. Emergence is defined as difficult-to-predict, higher-level patterns, behaviours and/or outputs. | <ul style="list-style-type: none"> <li>• T2DM is an emergent phenomenon that results from the complex interactions that occur among a range of heterogenous agents and factors within the rural health system.</li> <li>• The occurrence of T2DM can be viewed as a product of the above system characteristics coming together as a whole.</li> </ul> |
|---------------------|-----------------------------------------------------------------------------------------------------------------------------------------|--------------------------------------------------------------------------------------------------------------------------------------------------------------------------------------------------------------------------------------------------------------------------------------------------------------------------------------------------------|

## 5.0 Two complex systems approaches

In the health sciences, two complex systems approaches, Agent-Based Modelling (ABM) and System Dynamics (SD) modelling, are gaining popularity due to their capacity to capture and communicate the behaviours and dynamics of complex systems (23, 41-43) (Table 1). Rural health researchers are encouraged to explore how ABM and SD modelling may help with the identification, implementation and evaluation of new and existing strategies within complex rural health systems.

### 5.1 Agent-Based Modelling (ABM)

ABM is a type of microsimulation whereby interactions between synthetic populations of individual *agents* (e.g., molecules, cells, healthcare professionals, patients) can be observed within a computational environment (31, 32). Ideally, these interactions at the individual-level produce various macro-level patterns and complex behaviours that can grow, reflect or explain real-world phenomena (32). Agents can learn, adapt and respond to change based on the programming of demographic, lifestyle and environmental characteristics (29). Empirical data and/or expert theories can be used to instantiate ABMs depending on the modelling purpose (e.g., prediction, description, explanation) (41, 42, 44).

Methodologically, ABM can be performed hundreds or even thousands of times and the modelled outputs compared under different hypothetical scenarios (1, 20). ABM is an in-silico laboratory that has the capacity to evaluate the potential effectiveness of health policies over time (41, 42). For example, ABM could be used to estimate the incidence rate of T2DM within a virtual rural community following the implementation of various hypothetical health interventions and policies under changing environmental conditions. The reader is referred to several comprehensive resources covering the origins, purpose and use of ABM (1, 20, 29-32, 41, 42), including issues pertaining to the development, verification and validation of simulations (44, 45).

### 5.2 Systems Dynamics (SD) modelling

The first phase of SD modelling may involve the development of a Causal Loop Diagram (CLD) (33-35, 46-48). A CLD is a qualitative model that describes the conceptual, causal relationships between

1  
2  
3 variables that comprise a complex system. There are two types of causal loops in a CLD: *reinforcing*  
4 *loops* and *balancing loops* (46-48). Reinforcing loops (labelled 'R' in models) produce exponential  
5 *growth* and decay patterns, whereas balancing loops (labelled 'B' in models) act to stabilise the  
6 *system* (i.e., balancing loops are referred to as 'goal-seeking' loops). The combined effect of two or  
7 *more* loops in a CLD can create either stable or unstable equilibrium within a complex system. Time  
8 *delays* between system elements can further trigger oscillation and other unpredictable behaviours.  
9 *Conceptual* behaviour over time (BOT) graphs can visualise such patterns (49). Figure 2 presents a  
10 *'fixes that fails'* system archetype structure (50) and the associated behaviour over time graph applied  
11 *to the rural health workforce shortage problem.*

22  
23  
24  
25  
26 <Insert Figure 2 about here>  
27  
28  
29  
30

31 A CLD is a useful standalone tool for visualising complexity and conceptualising relatively simple  
32 *behaviours*, including how the various parts of a system (e.g., agents, factors, processes) interact to  
33 *explain* or create a problem (48). There are very few examples of CLDs applied specifically in rural  
34 *contexts* (e.g., 33-35), and further applications are warranted. Despite their holistic point of reference,  
35 *CLDs* are still only static representations and conceptual errors and complex behaviours are often only  
36 *realised* when models are translated into a dynamic format, such as SD modelling.

37 SD modelling is computational method that can be used to explore the structure and dynamics of both  
38 *simple* and complex systems (43, 46, 51). The method is capable of simulating non-linear behaviours  
39 *of complex systems* over time, primarily using differential equations and related mathematical  
40 *formulae* (30, 31, 51). SD modelling incorporates the same features from a CLD, such as variables,  
41 *feedback loops* and time delays; however, *stocks* and *flows* are also included in the representation to  
42 *allow for the accumulation* and depletion of key elements over time (43) (e.g., inventory, money,  
43 *assets, employees* – the rural health workforce). SD modelling has the capacity to reveal the complex  
44 *processes and pathways* that give rise to emergent system behaviours at a macro-level. It is a useful  
45  
46  
47  
48  
49  
50  
51  
52  
53  
54  
55  
56  
57  
58  
59  
60

1  
2  
3 complex systems approach for understanding counterintuitive behaviours within complex systems as a  
4 basis to identify potential leverage points for health-related interventions and policies. As with ABM,  
5 a range of existing data sources can be used to parameterise and calibrate simulations. For example, in  
6 terms of Australian rural health, there is a huge research opportunity around using the readily  
7 available and comprehensive National Health Workforce Data Tool (52), along with other data  
8 sources, to instantiate models and forecast various rural health system behaviours. The reader is  
9 directed to two papers using SD modelling, one examining the implementation of clean cooking  
10 interventions in rural India (36), and another that compared the demand and supply of Australian  
11 radiologists over 40 years under various scenarios (though not exclusively rural focussed) (37).

12  
13  
14  
15  
16  
17  
18  
19  
20  
21  
22  
23 Figure 3 presents a reformulation of the fixes that fail workforce CLD (Figure 2), this time as a Stock  
24 and Flow Diagram (SFD) to allow for quantitative simulation (Vensim PLE Version 9.3.0 x64).

25  
26  
27  
28  
29  
30  
31  
32  
33  
34  
35  
36  
37  
38  
39  
40  
41  
42  
43  
44  
45  
46  
47  
48  
49  
50  
51  
52  
53  
54  
55  
56  
57  
58  
59  
60  
Figure 3 demonstrates that it is far better to work on identifying and implementing the fundamental  
solution to the workforce problem than it is to invest in quick fixes to correct the shortage, even if this  
initially comes at a greater cost to time, expenses and resources. Vensim code provided in  
Supplementary Material.

<Insert Figure 3 about here>

## 6.0 Methods that are fit for purpose

Complex systems approaches are not intended to act as a replacement for traditional scientific  
methods well-suited to simpler problems (e.g., PICO problems) in the health sciences. The analytical  
trade-offs associated with both reductionist and complex systems approaches must be acknowledged.  
To describe these, we refer to the desiderata *precision*, *fit*, *generality*, and *realism* as reported by Ip et  
al (53).

1  
2  
3 Clinical and epidemiological methods have the advantage of being able to score relatively highly  
4 across statistical dimensions of precision and fit, albeit they equally score lower in measures of  
5 generality and realism. The inverse is generally true for complex systems approaches which tend to  
6 place a greater reliance on theory relative to data (20). Examples are shown in Figure 4.  
7  
8  
9

10  
11  
12 Precision and fit can be thought of as the capacity of a model to produce precise numerical outputs,  
13 and to make quantitative predictions based on historical data, respectively (53). Realism on the other  
14 hand, explains the accuracy to which a systems model has face validity, describes the world  
15 qualitatively, and agrees with expert mental models. Generality is the extent to which a model has  
16 external validity across domains (53).  
17  
18  
19  
20  
21  
22

23  
24  
25  
26 <Insert Figure 4 about here>  
27  
28  
29  
30

### 31 32 6.1 An example multi-method complex systems approach 33

34 The main point conveyed by Figure 4 is that there is a trade-off with respect to all four analytical  
35 desiderata (53). Satisfying all four concurrently is not possible via a single application, the outcome  
36 of which depends on the research question(s), project goal, use of data and approach. Fortunately, a  
37 multi-method complex systems approach could provide a promising way forward in rural health  
38 research.  
39  
40  
41  
42  
43  
44

45 To illustrate, sacrificing precision and fit for generality and realism is not necessarily a detriment if  
46 the first phase of a research program involves mapping all agents and factors from across the 'rural  
47 health system' that contribute to a health or health system outcome. In this regard, static systems  
48 modelling, such as CLDs or socioecological models, could be a useful starting point to conceptualise  
49 complexity and generate a rich picture of the problem and the key agents and factors involved as a  
50 means to direct subsequent analyses (e.g., 33-35). The next step in the research program might  
51 involve the use of a 'top down' computational method, such as SD modelling, to reveal how non-  
52  
53  
54  
55  
56  
57  
58  
59  
60

1  
2  
3 linear system dynamics and behaviours drive change and shape health outcomes, thereby increasing  
4 quantitative precision. The third and final phase may drill down further into key parts of the rural  
5 health system via the use of an ABM, to understand the complex processes that give rise to health or  
6 health system outcomes, albeit from a 'ground up' perspective that appreciates individual exchanges  
7 of information, labour and skill between health professionals and health system managers. This three-  
8 step progression from CLD to SD to ABM may act as a simple framework by which rural health  
9 researchers can become comfortable and familiar with systems modelling approaches into the future.

## 18 6.2 The many uses of complex systems approaches

20 From the above it is concluded that unlike traditional clinical and epidemiological methods, which are  
21 used exclusively to test well-defined and falsifiable *a priori* causal hypotheses, there are many  
22 different reasons to use a complex systems approach.

23 Static complex systems methods, such as CLDs and socioecological models (2, 27, 30, 33-35, 39, 47,  
24 48, 53), can be used to:

- 25 i. Synthesise large amounts of evidence and/or information
- 26 ii. Offer a 'big picture' perspective to e.g., support analysis and intervention design
- 27 iii. Illustrate complex causal feedback, theorise system dynamics, and identify possible leverage
- 28 iv. Generate new hypotheses and identify gaps in knowledge
- 29 v. Inform an understanding of the range of factors that contribute to an outcome
- 30 vi. Gain an understanding of the problem 'envelope' or system boundary
- 31 vii. Facilitate co-design, participatory and group model-building initiatives

32 Computational complex systems methods, such as ABM and SD modelling (1, 20, 29, 32, 36, 37, 41-  
33 46, 51, 53), can be used to:

- 34 i. Explain and forecast the emergence of various patterns and systems phenomena (e.g., survival  
35 rates, impact of health policies, direction of effect of interventions)
- 36 ii. Understand the mechanisms that drive the behaviour of complex systems

- 1
- 2
- 3 iii. Simulate the dynamics of a problem to observe how factors, structures and systems behave
- 4 over time
- 5
- 6
- 7 iv. Conduct multiple in-silico ‘what if’ experiments that otherwise would not be possible in situ
- 8 (i.e., policy comparative analyses)
- 9
- 10

## 11 **7.0 Towards a complex systems approach in rural health**

12  
13  
14  
15 Adopting a complex systems approach in rural health research would recognise that real, long-term  
16 change within rural communities is only created when systems and processes are redesigned and  
17 reconfigured, and not necessarily when a single ‘fix’ or individual-level health intervention is  
18 implemented (12, 22). The role of subject matter expertise and causal theories explaining health  
19 generation in rural settings would play a greater role in complexity science applications relative to a  
20 traditional scientific approach (10, 20). The triangulation of various sources of data across multiple  
21 system levels and from the perspective of various stakeholders would feed into the development of  
22 models to enrich understanding of where to intervene in rural health systems (18, 25). Involving rural  
23 health communities, consumers, service providers, stakeholders and policy-makers in the  
24 development of conceptual systems models would provide a sense of ownership and transparency of  
25 the model-construction process to ensure that the resulting solutions are endorsed long-term (43).

26  
27  
28  
29  
30  
31  
32  
33  
34  
35  
36  
37  
38  
39 Under a complexity framework, rural health researchers would ask not whether a specific intervention  
40 *works*; but rather, *how* new or existing solutions could be supported or degraded by the wider system  
41 (17, 24). When rural health systems are mapped, modelled and understood, it is possible to identify  
42 where key leverage points may be and how to best to manipulate them through a multidisciplinary  
43 effort (2, 18). These points of leverage may be found across all levels of the complex rural health  
44 system; however, further interrogation of the outputs would expose optimal targets for interventions  
45 and solutions given limited resources and competing priorities. To achieve this, the use of static and  
46 computational methods from the complexity sciences, such as CLD (35, 48), SD modelling (23, 43)  
47 and ABM (32, 41, 42) can be used to conceptualise and simulate the non-linear behaviours of  
48 complex rural health systems. Doing so will offer original data and evidence to complement  
49 traditional forms of scientific inquiry to translate effective new rural health interventions and policies.  
50  
51  
52  
53  
54  
55  
56  
57  
58  
59  
60



1  
2  
3 Indeed, a particularly important issue in rural health that systems methods could be applied to  
4 includes the widespread maldistribution and shortage of medical and allied health professionals (8, 9).  
5  
6 Understanding the complex interrelationships between various system wide factors that are driving  
7 this problem with the aim of identifying optimal systemic leverage given the presence of  
8  
9 counterintuitive behaviour is a major future research opportunity for the systems-based  
10  
11 (computational) modelling community.  
12  
13  
14

15  
16 The field of implementation science has become important in marrying the outcomes of complex  
17 systems thinking and real-world objectives for better health outcomes (18, 24, 25). Implementation  
18 science, which is increasingly integrating realist evaluation theories (24), has seen a tremendous  
19 uptake in the application of complex systems approaches as it allows a better understanding of what  
20  
21 *works*, for *whom*, *when*, and *why* (17, 18, 25). The integration of complexity science, implementation  
22 science and realist evaluation frameworks is also an encouraging future direction for rural health  
23  
24 research.  
25  
26  
27  
28  
29  
30

### 31 **8.0 Closing remarks**

32  
33 Rural health researchers are encouraged to consider how adopting a complex systems approach could  
34 provide a new spark in a field that arguably needs scientific innovation and complementary methods.  
35  
36 By taking a systems thinking perspective, rural health researchers can begin to explore, model and  
37 understand the myriad of factors and interactions that contribute to health outcomes and health system  
38  
39 issues at scale, both within and between different rural communities. The qualitative and quantitative  
40  
41 systems modelling methods described in this article will be highly useful should they find their way  
42  
43 into the rural health researcher's methodological and analytical toolkit – though the appropriate  
44  
45 training and learning elements are to precede novel applications to ensure best practice principles are  
46  
47 adhered to. The present authors welcome this challenge and embrace the possibilities that are derived  
48  
49 from adopting new ways of thinking about, and scientifically approaching, rural health issues.  
50  
51  
52  
53  
54  
55  
56  
57  
58  
59  
60

### **Contributorship statement**

All authors contributed to the content in accordance with the ICMJE guidelines for authorship. AH: Conceptualisation, writing – initial draft; reviewing and editing. JT/AB/GA: Writing, reviewing, editing and refining figures and models.

### **Competing interests**

None declared.

### **Funding**

This research received no external funding or sponsorship. Three members of the author team who completed this work (AH, JT, GA) are employed under the Australian government's Rural Health Multidisciplinary Training (RHMT) program. Award/Grant number is not applicable.

### **Data sharing statement**

No data are available.

## References

1. Luke DA, Stamatakis KA. Systems science methods in public health: Dynamics, networks, and agents. *Annu Rev Public Health*. 2012;33:357-76.
2. Meadows DH. *Thinking in systems: A primer*. London: Earthscan; 2009.
3. Barclay L, Phillips A, Lyle D. Rural and remote health research: Does the investment match the need? *Australian Journal of Rural Health*. 2018;26(2):74-9.
4. Lyle D, Greenhill J. Two decades of building capacity in rural health education, training and research in Australia: University Departments of Rural Health and Rural Clinical Schools. *Australian Journal of Rural Health*. 2018;26(5):314-22.
5. Wilson CR, Rourke J, Oandasan IF, Bosco C. Progress made on access to rural health care in Canada. *Canadian Family Physician*. 2020;66(1):31.
6. Schopfer DW. Rural health disparities in chronic heart disease. *Preventive Medicine*. 2021;152:106782.
7. Harrington RA, Califf RM, Balamurugan A, Brown N, Benjamin RM, Braund WE, et al. Call to action: Rural health: A presidential advisory from the American Heart Association and American Stroke Association. *Circulation*. 2020;141(10):e615-e44.
8. Iglehart J. The challenging quest to improve rural health care. *New England Journal of Medicine*. 2018;378(5):473-9.
9. AIHW. *Rural and remote health*. Canberra: AIHW; 2020.
10. Galea S, Riddle M, Kaplan GA. Causal thinking and complex system approaches in epidemiology. *Int J Epidemiol*. 2010;39(1):97-106.
11. Vandenbroucke JP, Broadbent A, Pearce N. Causality and causal inference in epidemiology: The need for a pluralistic approach. *Int J Epidemiol*. 2016;45(6):1776-86.

12. Rutter H, Savona N, Glonti K, Bibby J, Cummins S, Finegood DT, et al. The need for a complex systems model of evidence for public health. *The Lancet*. 2017;390(10112):2602-4.
13. Glass TA, Goodman SN, Hernán MA, Samet JM. Causal inference in public health. *Annu Rev Public Health*. 2013;34:61-75.
14. Keyes K, Galea S. What matters most: Quantifying an epidemiology of consequence. *Ann Epidemiol*. 2015;25(5):305-11.
15. Galea S, Keyes KM. What matters, when, for whom? Three questions to guide population health scholarship. *Inj Prev*. 2018;24(Suppl 1):i3-i6.
16. Diez Roux AV. Complex systems thinking and current impasses in health disparities research. *Am J Public Health*. 2011;101(9):1627-34.
17. Zamboni K, Schellenberg J, Hanson C, Betran AP, Dumont A. Assessing scalability of an intervention: why, how and who? *Health Policy and Planning*. 2019;34(7):544-52.
18. Koorts H, Rutter H. A systems approach to scale-up for population health improvement. *Health Res Policy Syst*. 2021;19(1):27.
19. Diez Roux AV. Integrating social and biologic factors in health research: A systems view. *Ann Epidemiol*. 2007;17(7):569-74.
20. Hernán MA. Invited commentary: Agent-Based Models for causal inference—Reweight data and theory in epidemiology. *American Journal of Epidemiology*. 2014;181(2):103-5.
21. Kouser HN, Barnard-Mayers R, Murray E. Complex systems models for causal inference in social epidemiology. *J Epidemiol Community Health*. 2020.
22. Crane M, Nathan N, McKay H, Lee K, Wiggers J, Bauman A. Understanding the sustainment of population health programmes from a whole-of-system approach. *Health Research Policy and Systems*. 2022;20(1):37.

- 1  
2  
3 23. Carey G, Malbon E, Carey N, Joyce A, Crammond B, Carey A. Systems science and systems  
4 thinking for public health: A systematic review of the field. *BMJ Open*. 2015;5(12):e009002.  
5  
6  
7  
8 24. McGill E, Er V, Penney T, Egan M, White M, Meier P, et al. Evaluation of public health  
9 interventions from a complex systems perspective: A research methods review. *Social Science &  
10 Medicine*. 2021;272:113697.  
11  
12  
13  
14  
15 25. Northridge ME, Metcalf SS. Enhancing implementation science by applying best principles of  
16 systems science. *Health Res Policy Syst*. 2016;14(1):74.  
17  
18  
19  
20 26. Trochim WM, Cabrera DA, Milstein B, Gallagher RS, Leischow SJ. Practical challenges of  
21 systems thinking and modeling in public health. *Am J Public Health*. 2006;96(3):538-46.  
22  
23  
24  
25 27. Kiekens A, Dierckx de Casterlé B, Vandamme AM. Qualitative systems mapping for complex  
26 public health problems: A practical guide. *PLoS One*. 2022;17(2):e0264463.  
27  
28  
29  
30 28. Ottino JM. Complex systems. *American Institute of Chemical Engineers AIChE Journal*.  
31 2003;49(2):292.  
32  
33  
34  
35 29. Marshall BD, Paczkowski MM, Seemann L, Tempalski B, Pouget ER, Galea S, et al. A complex  
36 systems approach to evaluate HIV prevention in metropolitan areas: Preliminary implications for  
37 combination intervention strategies. *PLoS One*. 2012;7(9):e44833.  
38  
39  
40  
41  
42 30. Hulme A, McLean S, Salmon PM, Thompson J, Lane BR, Nielsen RO. Computational methods to  
43 model complex systems in sports injury research: Agent-based modelling (ABM) and systems  
44 dynamics (SD) modelling. *British Journal of Sports Medicine*. 2019;53(24):1507.  
45  
46  
47  
48  
49 31. Hulme A, Thompson J, Nielsen RO, Read GJM, McLean S, Lane BR, et al. Using computational  
50 modelling for sports injury prevention: Agent-Based Modelling and System Dynamics modelling.  
51 *Human Factors and Ergonomics in Sport*: CRC Press; 2020. p. 323-44.  
52  
53  
54  
55  
56 32. Hulme A, Thompson J, Nielsen RO, Read GJM, Salmon PM. Towards a complex systems  
57 approach in sports injury research: Simulating running-related injury development with agent-based  
58 modelling. *British Journal of Sports Medicine*. 2019;53(9):560.  
59  
60

- 1  
2  
3 33. Allender S, Owen B, Kuhlberg J, Lowe J, Nagorcka-Smith P, Whelan J, Bell C. A community  
4 based systems diagram of obesity causes. PLOS ONE. 2015;10(7):e0129683.  
5  
6  
7  
8 34. Keane P, Ortega A, Linville J. Healthy kids, healthy Cuba: Findings from a group model building  
9 process in the rural southwest. Journal of Public Health Management and Practice. 2015;21:S70-S73.  
10  
11  
12  
13 35. Bolton KA, Fraser P, Lowe J, Moodie M, Bell C, Strugnell C, Hayward J, McGlashan J, Millar L,  
14 Whelan J, Brown A, Allender S. Generating change through collective impact and systems science for  
15 childhood obesity prevention: The GenR8 Change case study. PLOS ONE. 2022;17(5):e0266654.  
16  
17  
18  
19  
20 36. Chalise N, Kumar P, Priyadarshini P, Yadama GN. Dynamics of sustained use and abandonment  
21 of clean cooking systems: lessons from rural India. Environmental Research Letters.  
22  
23  
24 2018;13(3):035010.  
25  
26  
27 37. Taba ST, Atkinson SR, Lewis S, Chung KSK, Hossain L. A systems life cycle approach to  
28 managing the radiology profession: An Australian perspective. Australian Health Review.  
29  
30  
31 2015;39(2):228-39.  
32  
33  
34 38. Salmon PM, McLean S. Complexity in the beautiful game: Implications for football research and  
35 practice. Science and Medicine in Football. 2020;4(2):162-7.  
36  
37  
38  
39 39. Hulme A, McLean S, Salmon PM. Sport as a Complex Socio-Technical System. Human Factors  
40 and Ergonomics in Sport: CRC Press; 2020. p. 21-40.  
41  
42  
43  
44 40. Castellani BG, L. Map of the complexity sciences: Art and Science Factory, LLC.; 2021  
45  
46 [Available from: [https://www.art-sciencefactory.com/complexity-map\\_feb09.html](https://www.art-sciencefactory.com/complexity-map_feb09.html)  
47  
48  
49 41. Tracy M, Cerdá M, Keyes KM. Agent-based modeling in public health: Current applications and  
50 future directions. Annual Review of Public Health. 2018;39:77.  
51  
52  
53  
54 42. Nianogo RA, Arah OA. Agent-based modeling of noncommunicable diseases: A systematic  
55 review. Am J Public Health. 2015;105(3):e20-e31.  
56  
57  
58  
59  
60

- 1  
2  
3 43. Darabi N, Hosseinichimeh N. System dynamics modeling in health and medicine: A systematic  
4 literature review. *System Dynamics Review*. 2020;36(1):29-73.  
5  
6  
7  
8 44. Calder M, Craig C, Culley D, de Cani R, Donnelly CA, Douglas R, et al. Computational  
9 modelling for decision-making: Where, why, what, who and how. *Royal Society Open Science*.  
10 2018;5(6):172096.  
11  
12  
13  
14  
15 45. Rand W, Rust RT. Agent-based modeling in marketing: Guidelines for rigor. *International Journal*  
16 *of Research in Marketing*. 2011;28(3):181-93.  
17  
18  
19  
20 46. Forrester JW. Industrial dynamics. *Journal of the Operational Research Society*.  
21 1997;48(10):1037-41.  
22  
23  
24  
25 47. Senge PM. *The fifth discipline: The art and practice of the learning organization*: Currency; 2006.  
26  
27  
28 48. Littlejohns LB, Hill C, Neudorf C. Diverse approaches to creating and using Causal Loop  
29 Diagrams in public health research: Recommendations from a scoping review. *Public Health*  
30 *Reviews*. 2021;42.  
31  
32  
33  
34 49. Calancie L, Anderson S, Branscomb J, Apostolico AA, Lich KH. Using behavior over time graphs  
35 to spur systems thinking among public health practitioners. *Preventing Chronic Disease*. 2018;15.  
36  
37  
38  
39 50. Kim D. *Systems Archetypes II: Using Systems Archetypes to Take Effective Action Vol. 2*.  
40 Waltham, MA: Pegasus Communications; 1994.  
41  
42  
43  
44 51. Sterman JD. Learning from evidence in a complex world. *Am J Public Health*. 2006;96(3):505-14.  
45  
46  
47 52. The Department of Health and Aging. Data Tool: Australian Government; 2022 [Available from:  
48 <https://hwd.health.gov.au/datatool/>.  
49  
50  
51  
52 53. Ip EH, Rahmandad H, Shoham DA, Hammond R, Huang TT, Wang Y, et al. Reconciling  
53 statistical and systems science approaches to public health. *Health Educ Behav*. 2013;40(1  
54 Suppl):123s-31s.  
55  
56  
57  
58  
59  
60

### Figure legend/captions

Figure 1: Map of the complexity sciences. Redrawn and modified from Castellani and Gerrits (40).

The full colour depiction with associated scholars in the corresponding fields can be viewed at:

[https://www.art-sciencefactory.com/complexity-map\\_feb09.html](https://www.art-sciencefactory.com/complexity-map_feb09.html). The five traditions are: (i) dynamical systems theory; (ii) systems theory; (iii) complex systems theory; (iv) cybernetics; and (v) artificial intelligence. Rural health is indicated from ~2022 onwards leaving open the possibility of applying complex systems approaches to contemporary issues in this space.

Figure 2: A Causal Loop Diagram (CLD) (left) that theoretically explains the behaviour of the rural health workforce over time (right) framed through the lens of a ‘fixes that fails’ systems archetype (50). Polarity indicators, positive (+) and negative (-), indicate that variables *move in the same direction* or *move in opposite direction*, respectively. Reinforcing loops and balancing loops are represented with the notation (R) and (B), respectively. Time delays are shown by two dashed lines. The fixes that fail system archetype in Figure 2 explains that the immediate problem of a rural workforce shortage is giving rise to short-term hiring solutions. For example, under a return of service obligation scheme, health professionals may be required to spend a set numbers of years working in rural locations following government/state supported training. Whilst the short-term intervention appears to improve the situation under a narrow time horizon, over the long run, the solution is equally increasing turnover rate within the rural health service sector, making the shortage worse. Political cycles and/or changes to governments may explain the archetypal fixes that fail system structure. Researchers should consider transforming the CLD into a Stock and Flow Diagram (SFD) as a basis to simulate more complex system behaviours using System Dynamics (SD) modelling.

Figure 3: Stock and Flow Diagram (SFD) (left) created based on the fixes that fail Causal Loop Diagram (CLD) (Figure 2). For the purpose of this article and to demonstrate SFD, the variables ‘Rural health workforce’ and ‘Unintended consequence’ from the initial CLD are hereby represented as ‘stocks’ (square boxes) that can accumulate and drain based on inflows (i.e., ‘Recruitment’ and ‘Accumulating consequences’) and outflows (i.e., ‘Turnover’). To reflect the delay in decision-



1  
2  
3 makers perception of the gap, an additional stock is incorporated, titled 'Perceived gap between  
4 required and actual rural health workforce'. The same balancing and reinforcing loops from the CLD  
5 indicate that whilst the short-term solution is helping to correct the symptomatic problem (i.e.,  
6 balancing loop (B)), it is also part of a greater reinforcing (exponential growth (R)) loop that  
7 eventually makes the problem worse due to the effect of the growing unintended consequence. The  
8 simulated behaviour over time graph indicates that the short-term hiring solution does indeed initially  
9 increase the number of rural health workers. Over time the fix can no longer control the shortage, to  
10 the point that the fix actually contributes to it. Loop dominance quickly shifts from the balancing  
11 loop to the reinforcing loop. Understanding system behaviour using dynamic systems science  
12 approaches is vital for identifying counterintuitive behaviours and identifying system leverage,  
13 especially as CLD, SFD and SD models grow in size and complexity.  
14  
15  
16  
17  
18  
19  
20  
21  
22  
23  
24  
25  
26

27 Figure 4: The trade-off between the analytical desiderata of precision, fit, realism and generality. The  
28 article by Ip and colleagues (53) provides an excellent overview of key terms and concepts and enters  
29 into greater detail. Panel A: Simple linear regression analysis; Panel B: Agent-Based Model (ABM)  
30 of estimated disease incidence; Panel C: System Dynamics (SD) model of health service costs to  
31 health service utilisation; Panel D: Causal Loop Diagram (CLD) or a socioecological model of a  
32 health system. We note that whilst four simple examples are shown, there are many different  
33 traditional statistical approaches and complex systems approaches, including multiple variations  
34 *within* the approaches themselves, that would produce different results across the four dimensions.  
35  
36  
37  
38  
39  
40  
41  
42  
43  
44  
45  
46  
47  
48  
49  
50  
51  
52  
53  
54  
55  
56  
57  
58  
59  
60

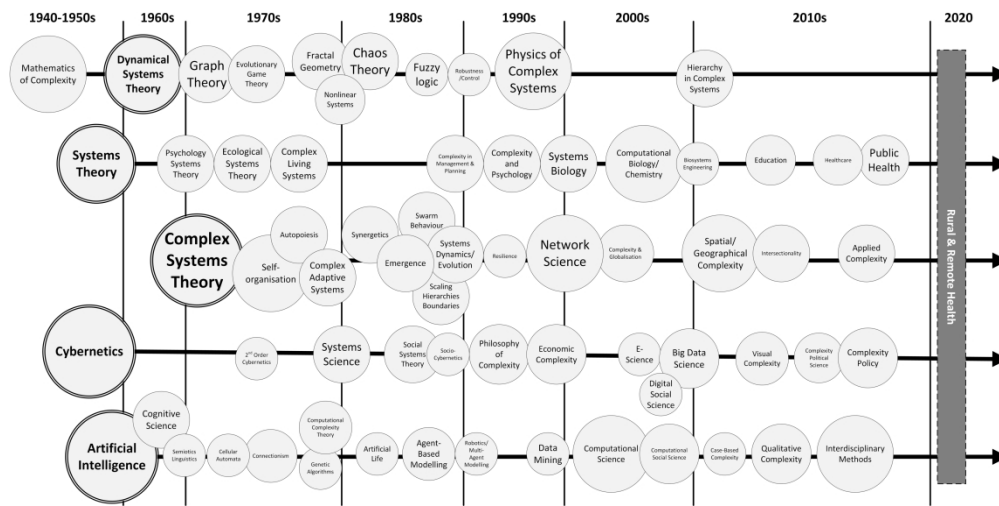

Figure 1: Map of the complexity sciences. Redrawn and modified from Castellani and Gerrits (40). The full colour depiction with associated scholars in the corresponding fields can be viewed at: [https://www.art-sciencefactory.com/complexity-map\\_feb09.html](https://www.art-sciencefactory.com/complexity-map_feb09.html). The five traditions are: (i) dynamical systems theory; (ii) systems theory; (iii) complex systems theory; (iv) cybernetics; and (v) artificial intelligence. Rural health is indicated from ~2022 onwards leaving open the possibility of applying complex systems approaches to contemporary issues in this space.

352x175mm (300 x 300 DPI)

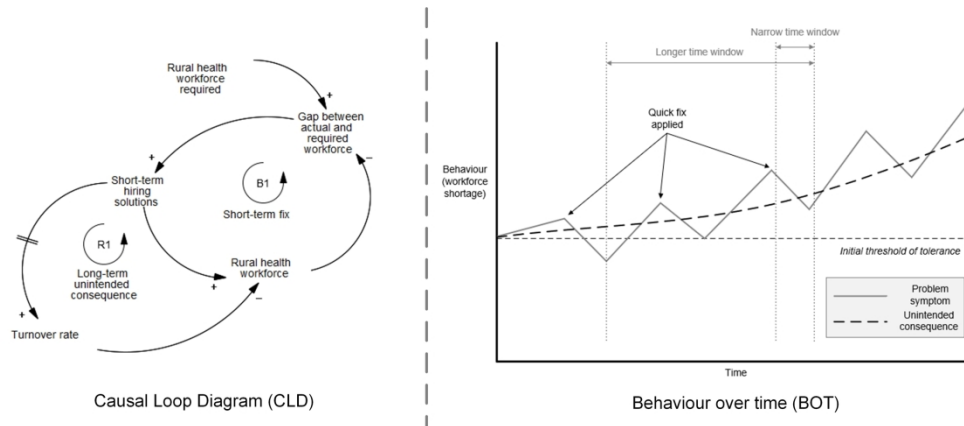

Figure 2: A Causal Loop Diagram (CLD) (left) that theoretically explains the behaviour of the rural health workforce over time (right) framed through the lens of a 'fixes that fails' systems archetype (50). Polarity indicators, positive (+) and negative (-), indicate that variables move in the same direction or move in opposite direction, respectively. Reinforcing loops and balancing loops are represented with the notation (R) and (B), respectively. Time delays are shown by two dashed lines. The fixes that fail system archetype in Figure 2 explains that the immediate problem of a rural workforce shortage is giving rise to short-term hiring solutions. For example, under a return of service obligation scheme, health professionals may be required to spend a set number of years working in rural locations following government/state supported training. Whilst the short-term intervention appears to improve the situation under a narrow time horizon, over the long run, the solution is equally increasing turnover rate within the rural health service sector, making the shortage worse. Political cycles and/or changes to governments may explain the archetypal fixes that fail system structure. Researchers should consider transforming the CLD into a Stock and Flow Diagram (SFD) as a basis to simulate more complex system behaviours using System Dynamics (SD) modelling.

201x85mm (300 x 300 DPI)

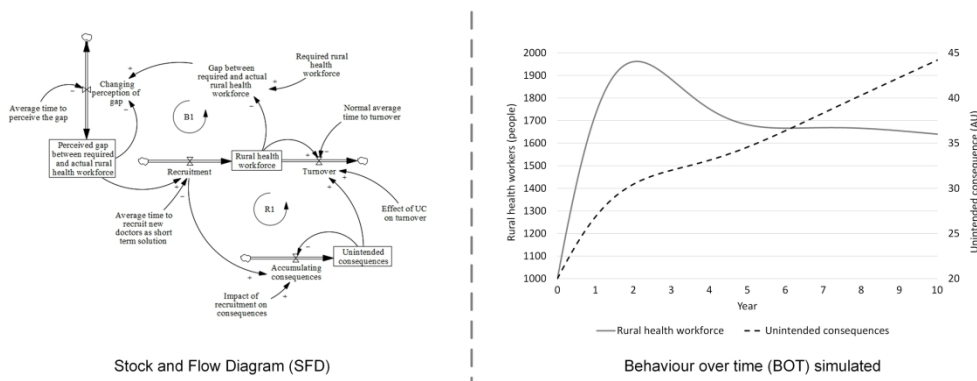

Figure 3: Stock and Flow Diagram (SFD) (left) created based on the fixes that fail Causal Loop Diagram (CLD) (Figure 2). For the purpose of this article and to demonstrate SFD, the variables 'Rural health workforce' and 'Unintended consequence' from the initial CLD are hereby represented as 'stocks' (square boxes) that can accumulate and drain based on inflows (i.e., 'Recruitment' and 'Accumulating consequences') and outflows (i.e., 'Turnover'). To reflect the delay in decision-makers perception of the gap, an additional stock is incorporated, titled 'Perceived gap between required and actual rural health workforce'. The same balancing and reinforcing loops from the CLD indicate that whilst the short-term solution is helping to correct the symptomatic problem (i.e., balancing loop (B)), it is also part of a greater reinforcing (exponential growth (R)) loop that eventually makes the problem worse due to the effect of the growing unintended consequence. The simulated behaviour over time graph indicates that the short-term hiring solution does indeed initially increase the number of rural health workers. Over time the fix can no longer control the shortage, to the point that the fix actually contributes to it. Loop dominance quickly shifts from the balancing loop to the reinforcing loop. Understanding system behaviour using dynamic systems science approaches is vital for identifying counterintuitive behaviours and identifying system leverage, especially as CLD, SFD and SD models grow in size and complexity. Equations appended.

224x86mm (300 x 300 DPI)

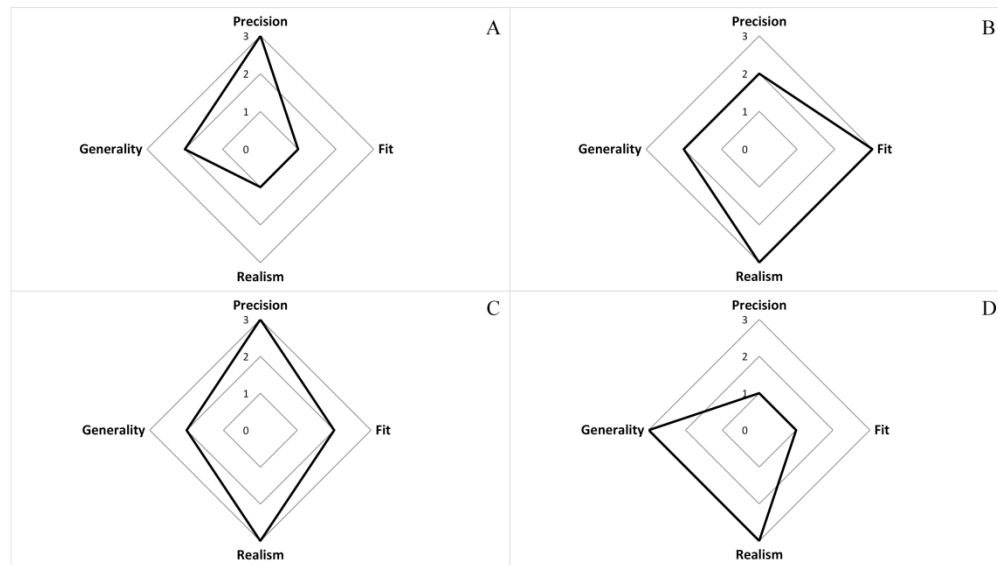

Figure 4: The trade-off between the analytical desiderata of precision, fit, realism and generality. The article by Ip and colleagues (53) provides an excellent overview of key terms and concepts and enters into greater detail. Panel A: Simple linear regression analysis; Panel B: Agent-Based Model (ABM) of estimated disease incidence; Panel C: System Dynamics (SD) model of health service costs to health service utilisation; Panel D: Causal Loop Diagram (CLD) or a socioecological model of a health system. We note that whilst four simple examples are shown, there are many different traditional statistical approaches and complex systems approaches, including multiple variations within the approaches themselves, that would produce different results across the four dimensions.

278x156mm (300 x 300 DPI)

1  
2  
3 (01) Accumulating consequences=  
4

5       Impact of recruitment on consequences\*Recruitment\*(Maximum UC-Unintended consequences  
6  
7       )/Maximum UC

8  
9       Units: consequences/Year  
10

11  
12 (02) Average time to perceive the gap=  
13

14       1

15  
16       Units: Year  
17

18  
19 (03) Average time to recruit new doctors as short term solution=  
20

21       1

22  
23       Units: Year  
24  
25

26  
27 (04) Changing perception of gap=  
28

29       (Gap between required and actual rural health workforce-Perceived gap between required and  
30       actual rural health workforce

31  
32       )/Average time to perceive the gap

33  
34       Units: people/Year  
35  
36

37  
38 (05) Effect of UC on turnover(  
39

40       [(0,0)-(10,10)],(0,0),(0.2,1),(1,5))

41  
42       Units: dmnl  
43  
44

45 (06) FINAL TIME = 10  
46

47       Units: Year  
48

49       The final time for the simulation.  
50  
51

52 (07) Gap between required and actual rural health workforce=  
53

54       Required rural health workforce-Rural health workforce  
55  
56

57       Units: people  
58  
59  
60

1  
2  
3 (08) Impact of recruitment on consequences=  
4

5 0.01

6  
7 Units: consequences/people  
8  
9

10 (09) INITIAL TIME = 0

11  
12 Units: Year

13  
14 The initial time for the simulation.  
15  
16

17  
18 (10) Maximum UC=  
19

20 100

21  
22 Units: consequences  
23  
24

25 (11) Normal average time to turnover=  
26

27 10

28  
29 Units: Year  
30  
31

32  
33 (12) Perceived gap between required and actual rural health workforce= INTEG  
34

35 (

36 Changing perception of gap,  
37

38 1000)  
39

40 Units: people  
41  
42  
43

44 (13) Recruitment=  
45

46 Perceived gap between required and actual rural health workforce/Average time to recruit new  
47 doctors as short term solution  
48

49 Units: people/Year  
50  
51

52 (14) Required rural health workforce=  
53

54 2000

55  
56 Units: people  
57  
58  
59  
60

1  
2  
3 (15) Rural health workforce= INTEG (  
4

5 Recruitment-Turnover,  
6

7 1000)  
8

9 Units: people  
10

11  
12 (16) SAVEPER =  
13

14 TIME STEP  
15

16 Units: Year [0,?]  
17

18 The frequency with which output is stored.  
19  
20

21  
22 (17) TIME STEP = 0.01  
23

24 Units: Year [0,?]  
25

26 The time step for the simulation.  
27  
28

29 (18) Turnover=  
30

31 (Rural health workforce/Normal average time to turnover)\*Effect of UC on turnover  
32

33 (Unintended consequences/Maximum UC)  
34

35 Units: people/Year  
36  
37

38  
39 (19) Unintended consequences= INTEG (  
40

41 Accumulating consequences,  
42

43 20)  
44

45 Units: consequences  
46  
47  
48  
49  
50  
51  
52  
53  
54  
55  
56  
57  
58  
59  
60
