# Supplementary material for: The need for a complex systems approach in rural health research
Source: HighWire-hosted journal article supplement (doi:10.1136/bmjopen-2022-064646), 2022-10-01
Supplement: bmjopen-2022-064646supp001_data_supplement.pdf [file bmjopen-2022-064646supp001_data_supplement.pdf]

- (01) Accumulating consequences=  
Impact of recruitment on consequences\*Recruitment\*(Maximum UC-Unintended consequences  
)/Maximum UC  
Units: consequences/Year
- (02) Average time to perceive the gap=  
1  
Units: Year
- (03) Average time to recruit new doctors as short term solution=  
1  
Units: Year
- (04) Changing perception of gap=  
(Gap between required and actual rural health workforce-Perceived gap between required and  
actual rural health workforce  
)/Average time to perceive the gap  
Units: people/Year
- (05) Effect of UC on turnover(  
[(0,0)-(10,10)],(0,0),(0.2,1),(1,5))  
Units: dmnl
- (06) FINAL TIME = 10  
Units: Year  
The final time for the simulation.
- (07) Gap between required and actual rural health workforce=  
Required rural health workforce-Rural health workforce  
Units: people

(08) Impact of recruitment on consequences=

0.01

Units: consequences/people

(09) INITIAL TIME = 0

Units: Year

The initial time for the simulation.

(10) Maximum UC=

100

Units: consequences

(11) Normal average time to turnover=

10

Units: Year

(12) Perceived gap between required and actual rural health workforce= INTEG

(

Changing perception of gap,

1000)

Units: people

(13) Recruitment=

Perceived gap between required and actual rural health workforce/Average time to recruit new doctors as short term solution

Units: people/Year

(14) Required rural health workforce=

2000

Units: people

(15) Rural health workforce= INTEG ( Recruitment-Turnover, 1000)

Units: people

(16) SAVEPER = TIME STEP

Units: Year [0,?]

The frequency with which output is stored.

(17) TIME STEP = 0.01

Units: Year [0,?]

The time step for the simulation.

(18) Turnover=

(Rural health workforce/Normal average time to turnover)\*Effect of UC on turnover

(Unintended consequences/Maximum UC)

Units: people/Year

(19) Unintended consequences= INTEG ( Accumulating consequences, 20)

Units: consequences
